# Supplementary material for: Reaction of ketone hydrazones with TeCl4: isolation and reactions of novel divinyl telluride
Source: Royal Society of Chemistry journal article supplement (doi:10.1039/d0ob00782j), 2020-01-01
Supplement: d0ob00782j1.pdf [file d0ob00782j1.pdf]

**Electronic Supplementary Information for**

**“Reaction of ketone hydrazones with TeCl<sub>4</sub>: Isolation and reaction of divinyl telluride”**

By Kentaro Okuma, Yuxuan Qu, Aoi Suetome, and Noriyoshi Nagahora

Department of Chemistry, Fukuoka University, Jonan-ku, Fukuoka 814-0180, Japan

S1 - S24           <sup>1</sup>H and <sup>13</sup>C NMR spectra of new compounds

S25 - S38           X-ray crystallographic data

# <sup>1</sup>H- and <sup>13</sup>C-NMR Spectra of Products

## Bis-1-(*p*-tolyl)vinyl telluride **3a**:

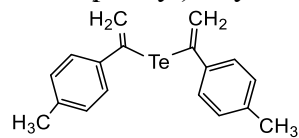

### <sup>1</sup>H NMR (400 MHz, CDCl<sub>3</sub>)

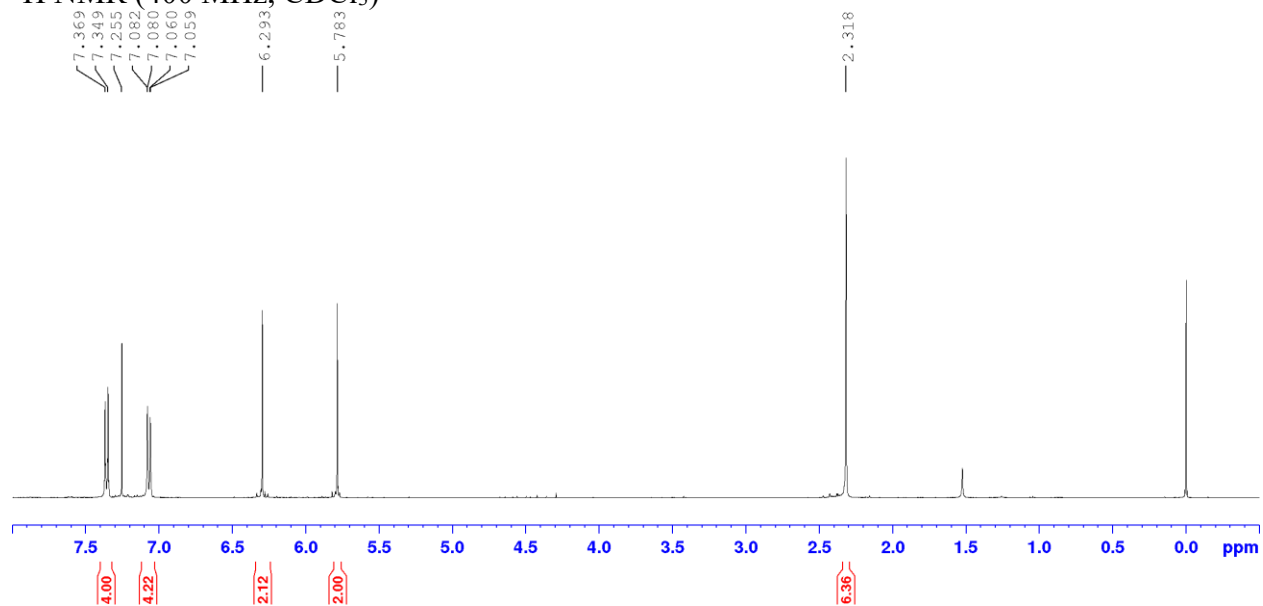

### <sup>13</sup>C NMR (101 MHz, CDCl<sub>3</sub>)

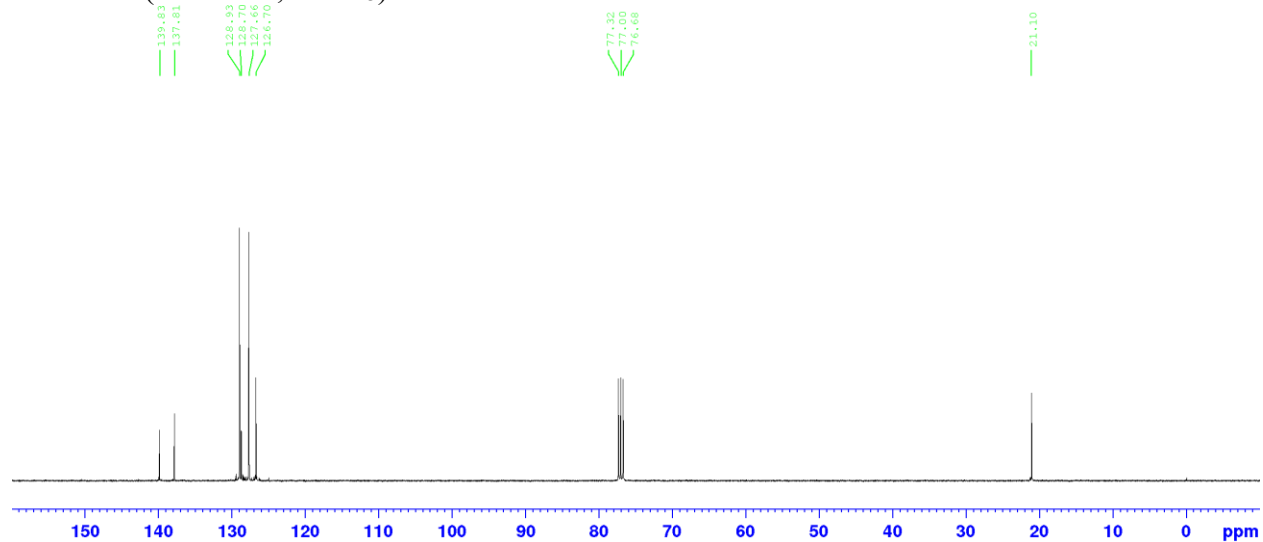

Bis-1-(phenyl)vinyl telluride **3b**:

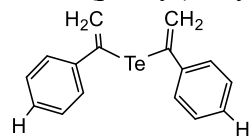

$^1\text{H}$  NMR (400 MHz,  $\text{CDCl}_3$ )

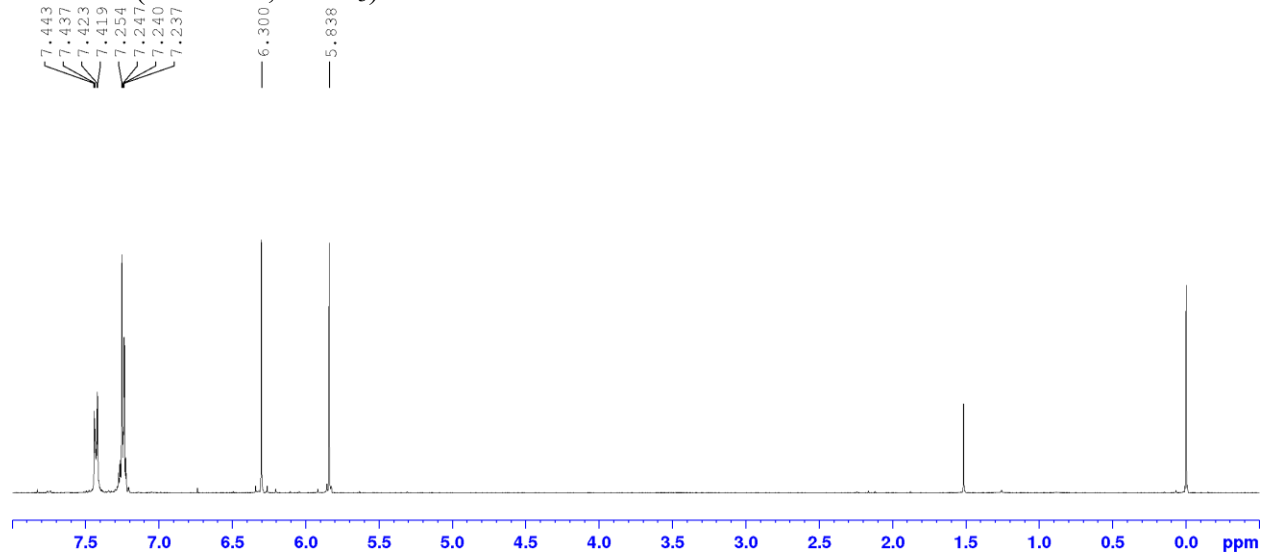

$^{13}\text{C}$  NMR (101 MHz,  $\text{CDCl}_3$ )

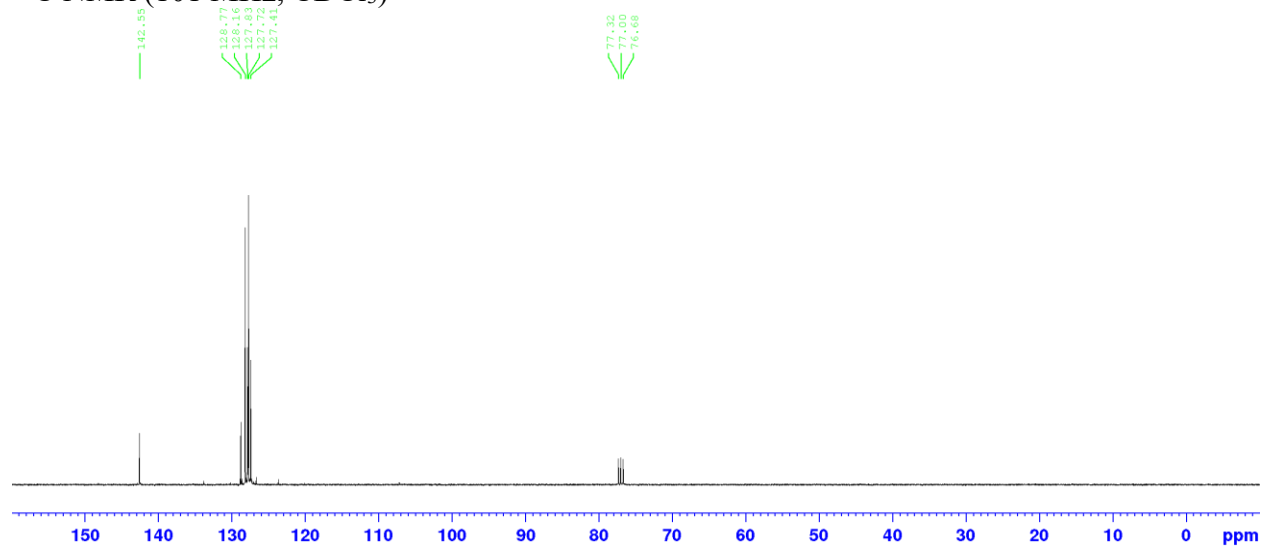

Bis-1-(*p*-chlorophenyl)vinyl telluride **3c**:

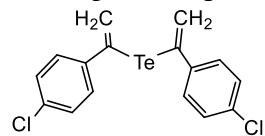

$^1\text{H NMR}$  (400 MHz,  $\text{CDCl}_3$ )

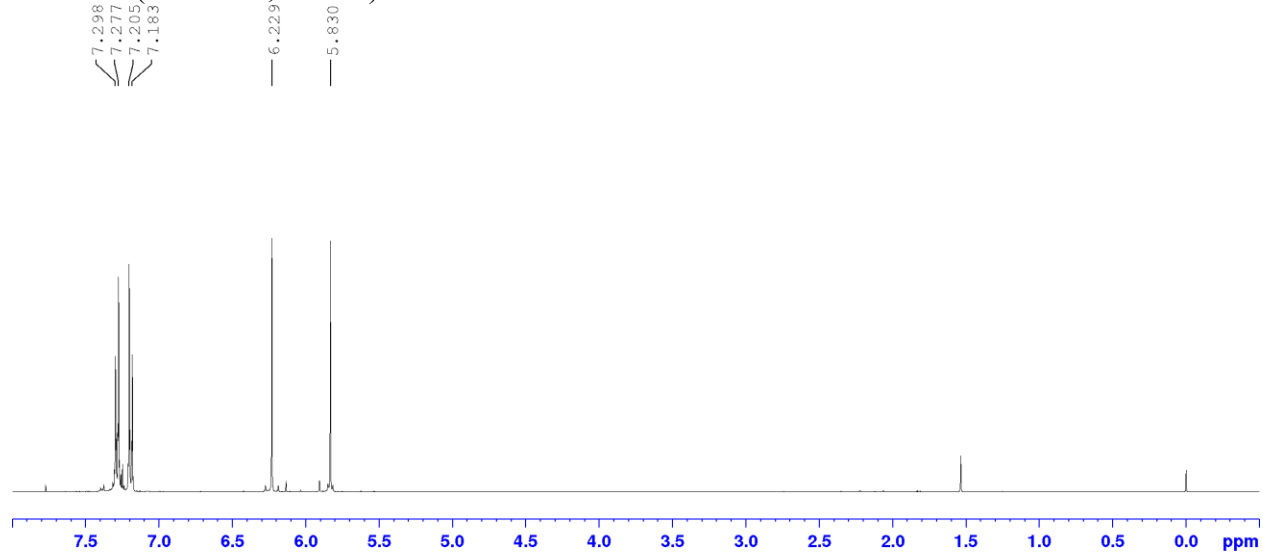

$^{13}\text{C NMR}$  (101 MHz,  $\text{CDCl}_3$ )

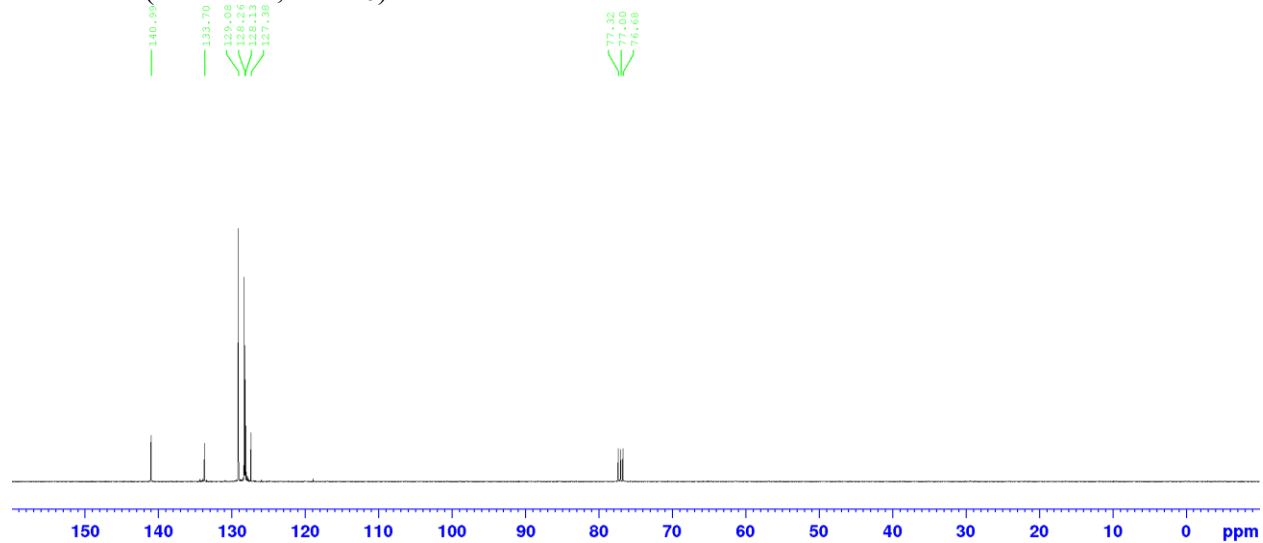

Bis-1-(*p*-bromophenyl)vinyl telluride **3d**:

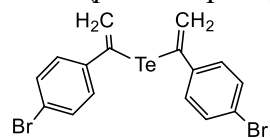

$^1\text{H NMR}$  (400 MHz,  $\text{CDCl}_3$ )

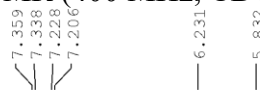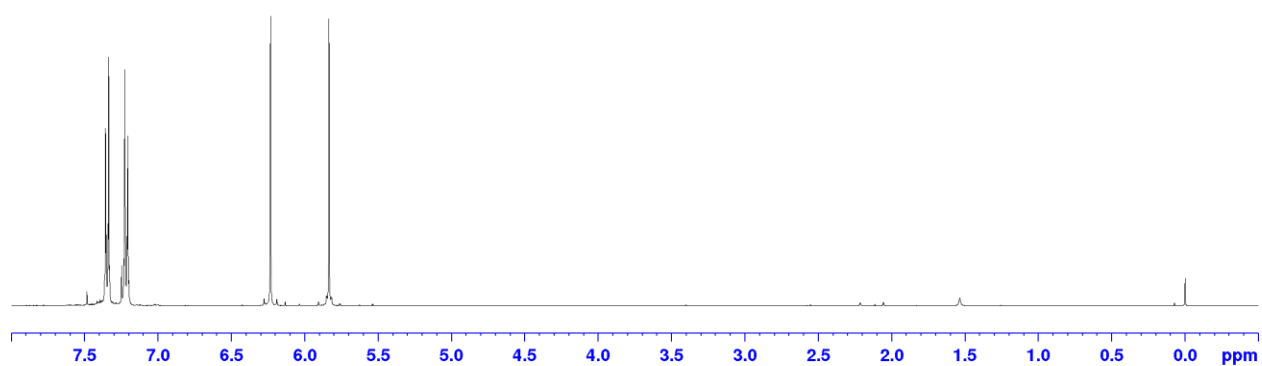

$^{13}\text{C NMR}$  (101 MHz,  $\text{CDCl}_3$ )

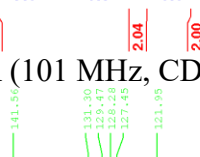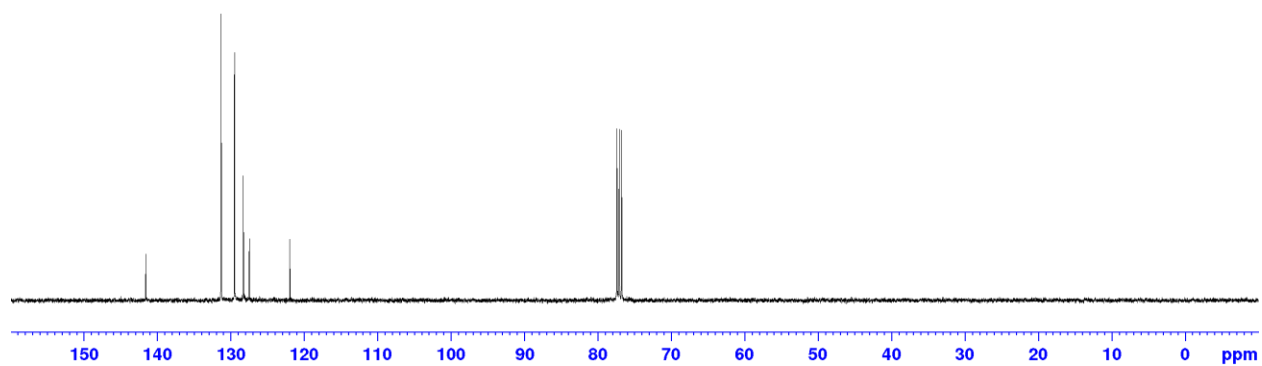

Bis-1-(*p*-nitrophenyl)vinyl telluride **3e**:

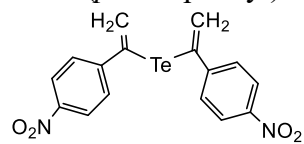

$^1\text{H NMR}$  (400 MHz,  $\text{CDCl}_3$ )

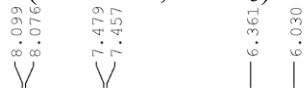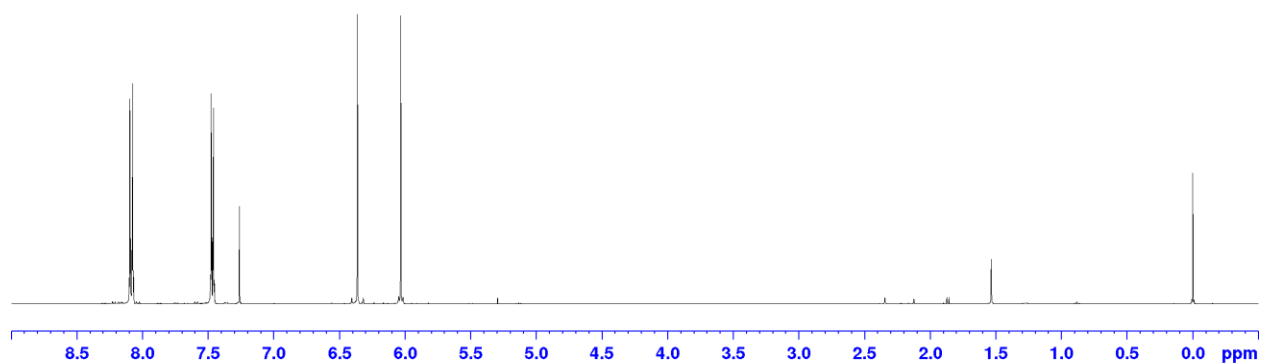

$^{13}\text{C NMR}$  (101 MHz,  $\text{CDCl}_3$ )

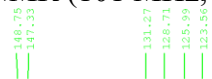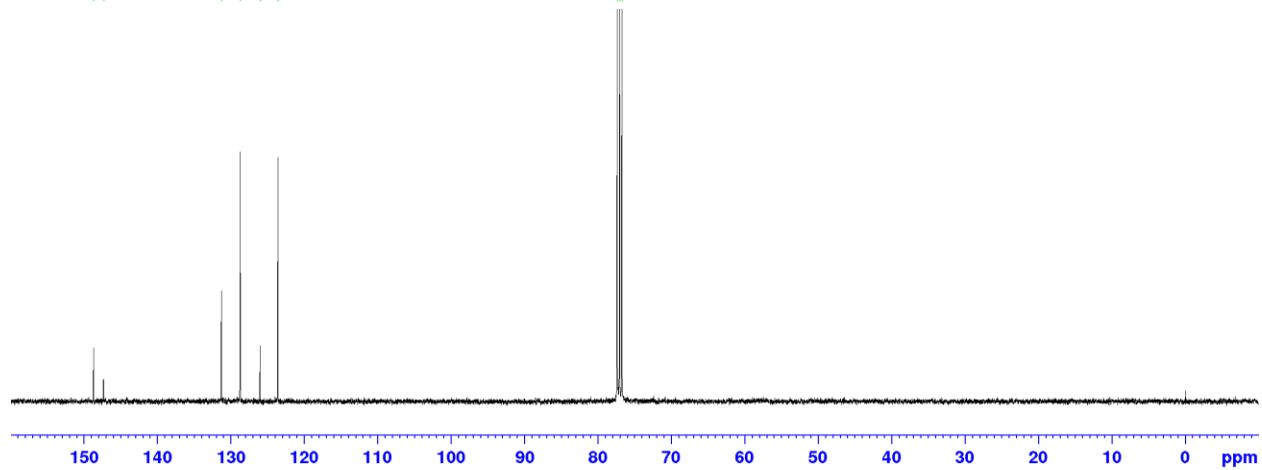

Bis-1-([1,1'-biphenyl]-4-yl)vinyl telluride **3f**:

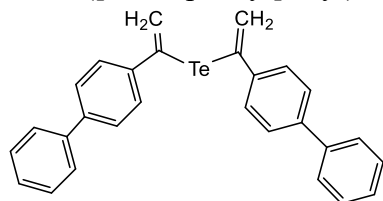

$^1\text{H NMR}$  (400 MHz,  $\text{CDCl}_3$ )

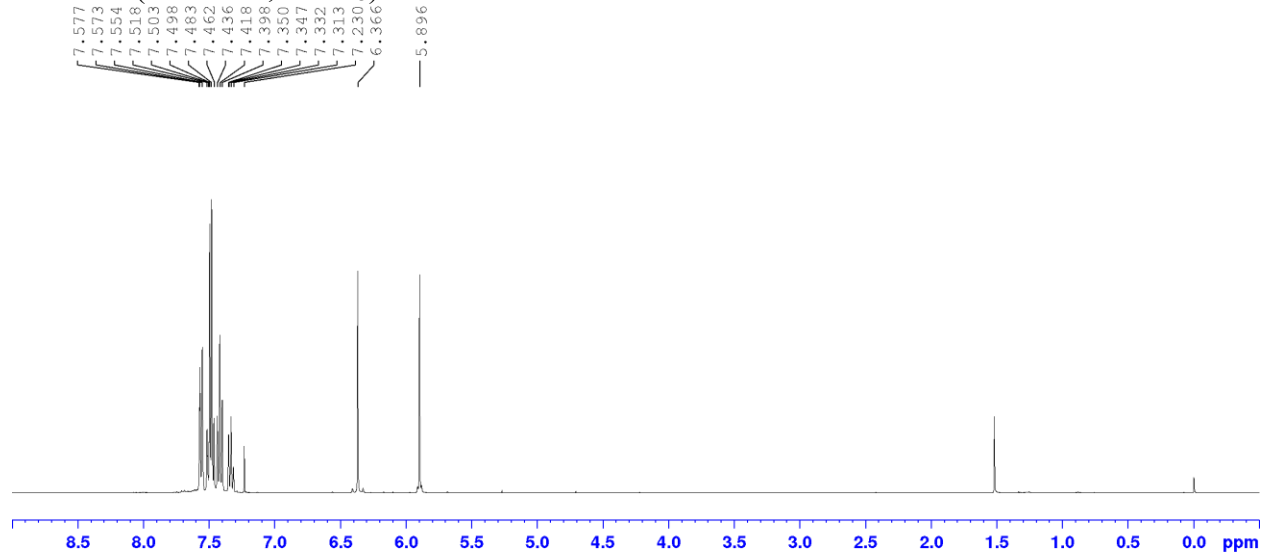

$^{13}\text{C NMR}$  (101 MHz,  $\text{CDCl}_3$ )

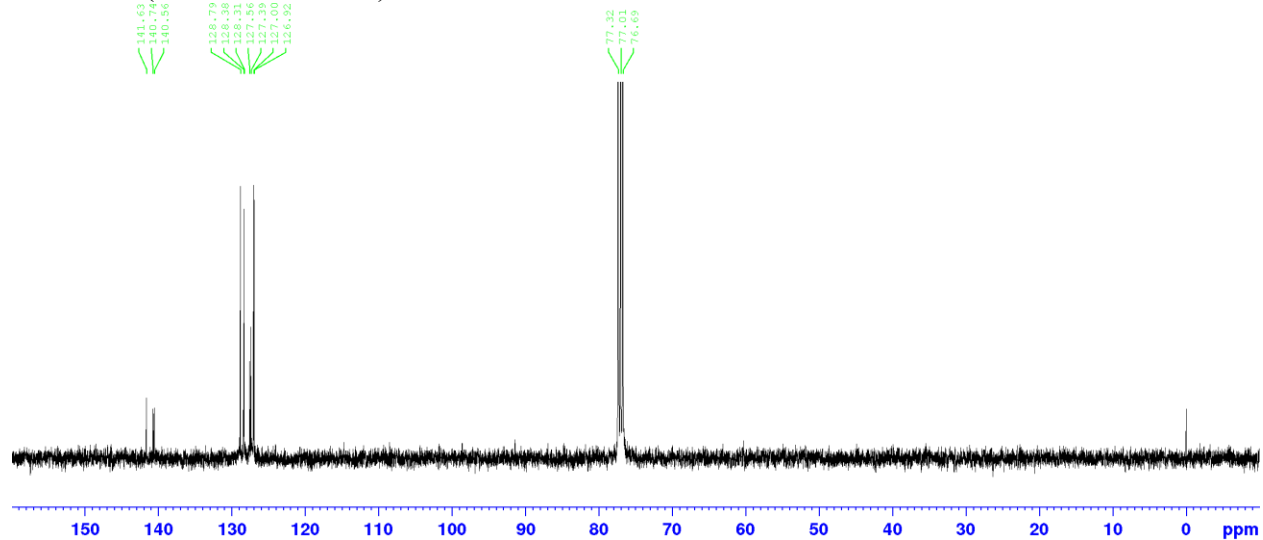

Bis-1-(*o*-tolyl)vinyl telluride **3g**:

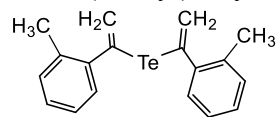

<sup>1</sup>H NMR (400 MHz, CDCl<sub>3</sub>)

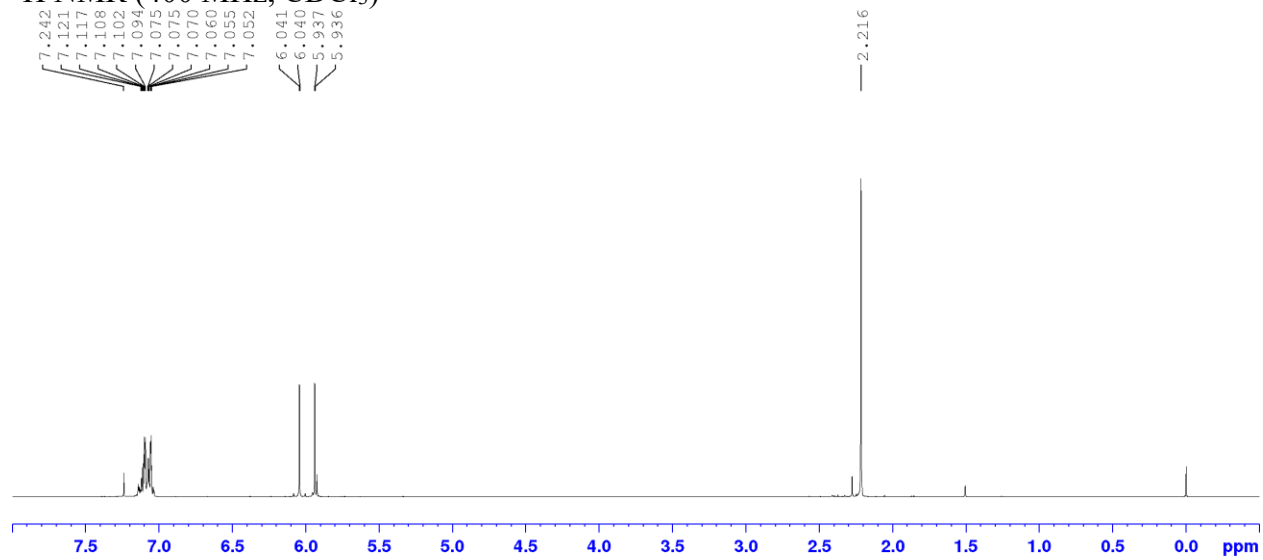

<sup>13</sup>C NMR (101 MHz, CDCl<sub>3</sub>)

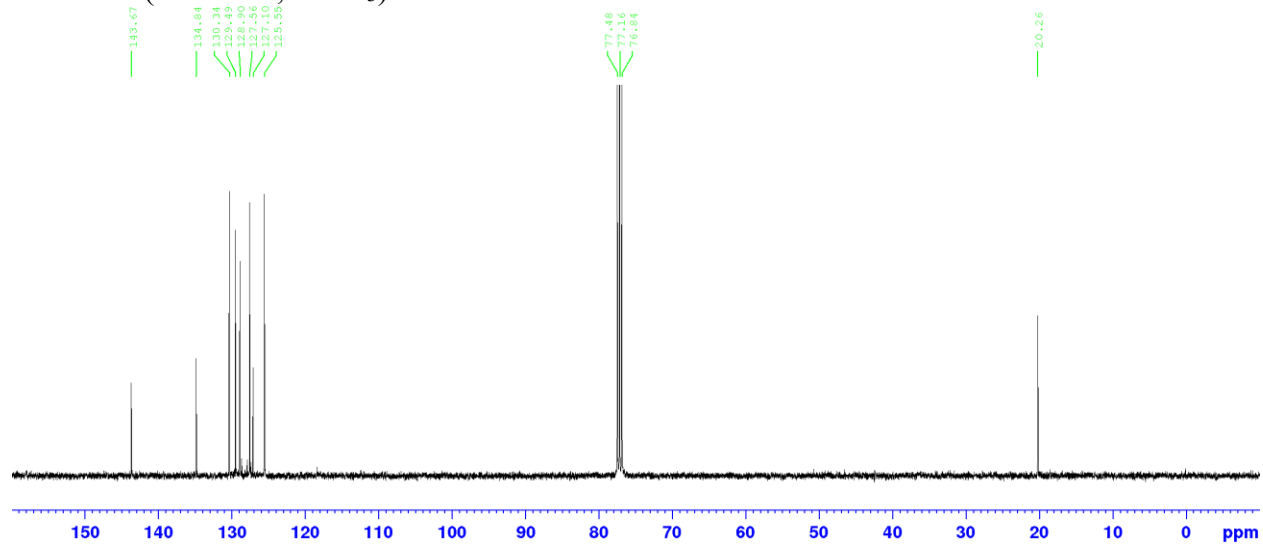



Bis-1-(*p*-methylphenyl)vinyltellurium dibromide **5a**:

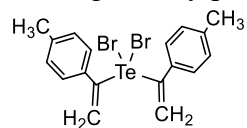

$^1\text{H NMR}$  (400 MHz,  $\text{CDCl}_3$ )

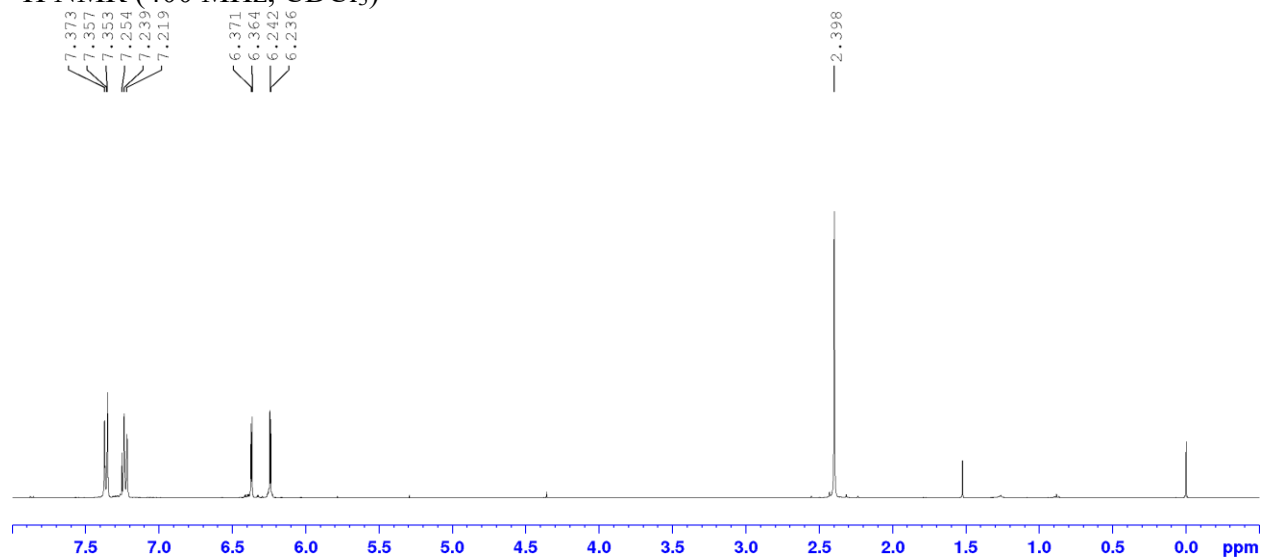

$^{13}\text{C NMR}$  (101 MHz,  $\text{CDCl}_3$ )

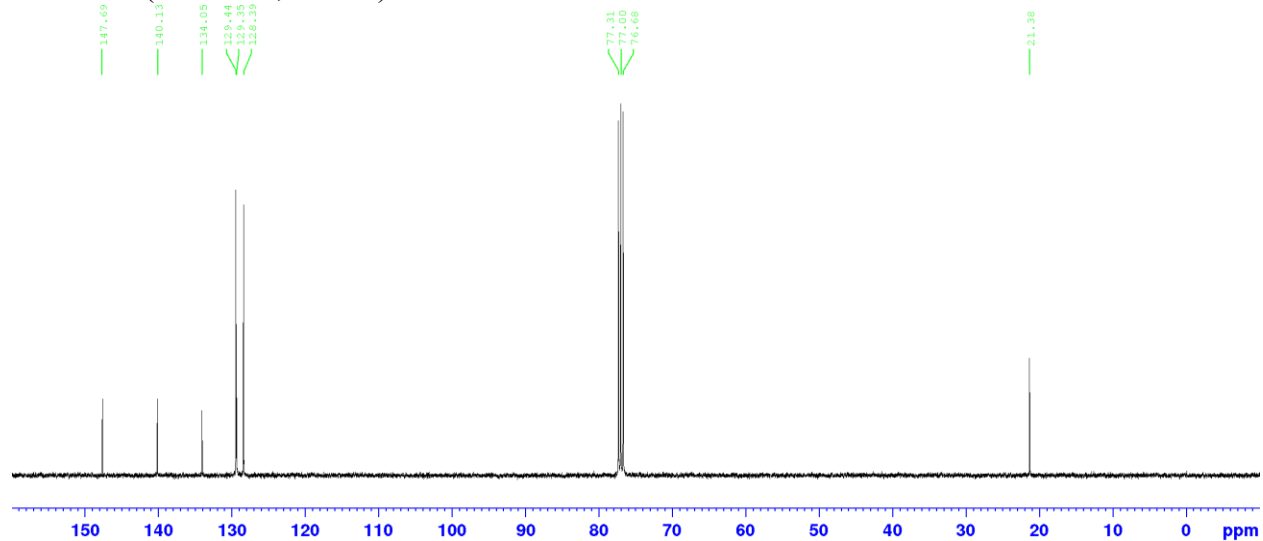

Bis-1-(*p*-bromophenyl)vinyltellurium dibromide **5d**:

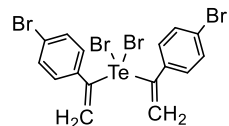

$^1\text{H NMR}$  (400 MHz,  $\text{CDCl}_3$ )

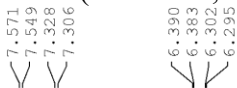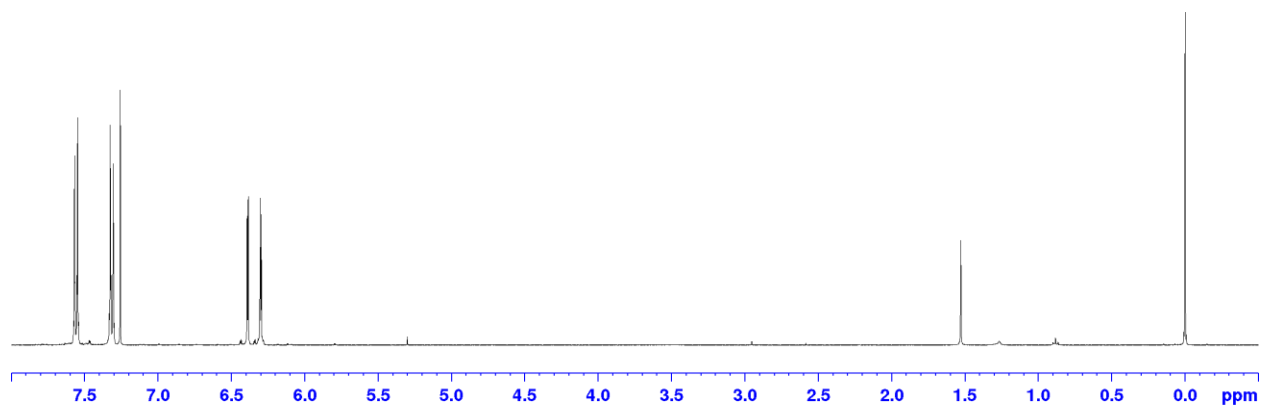

$^{13}\text{C NMR}$  (101 MHz,  $\text{CDCl}_3$ )

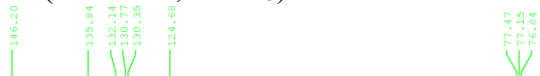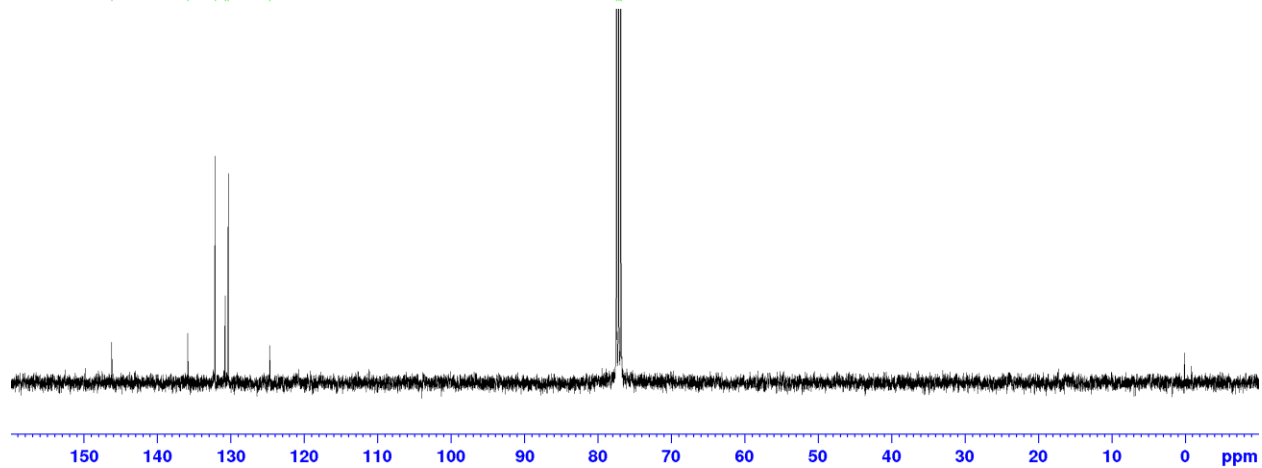

Bis-1-(*p*-nitrophenyl)vinyltellurium dibromide **5e**:

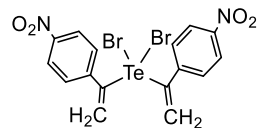

$^1\text{H NMR}$  (400 MHz,  $\text{CDCl}_3$ )

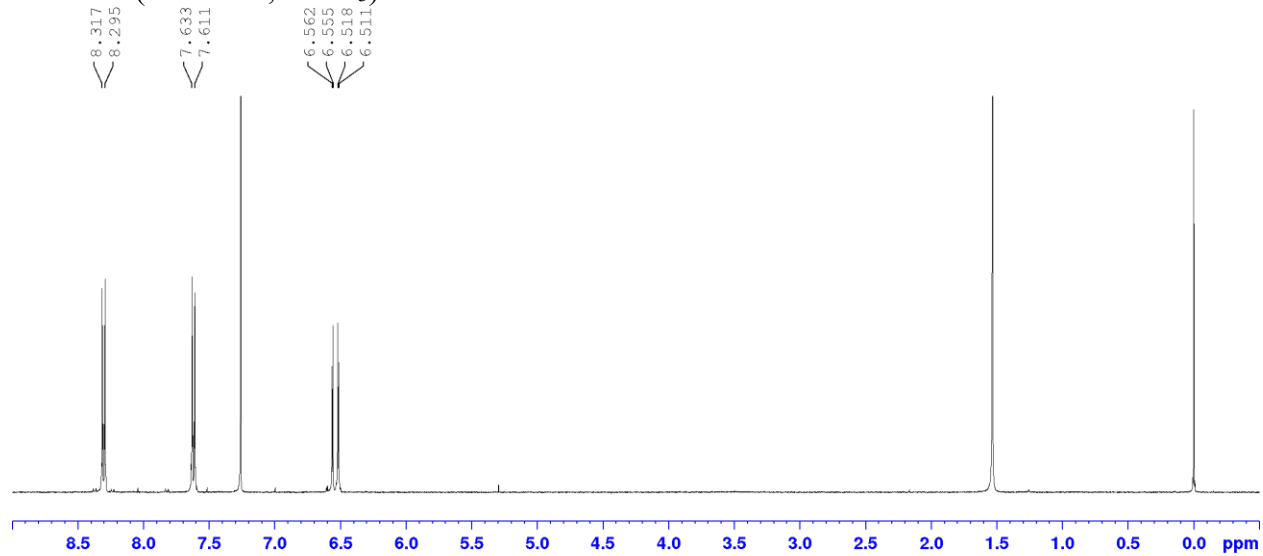

$^{13}\text{C NMR}$  (101 MHz,  $\text{CDCl}_3$ )

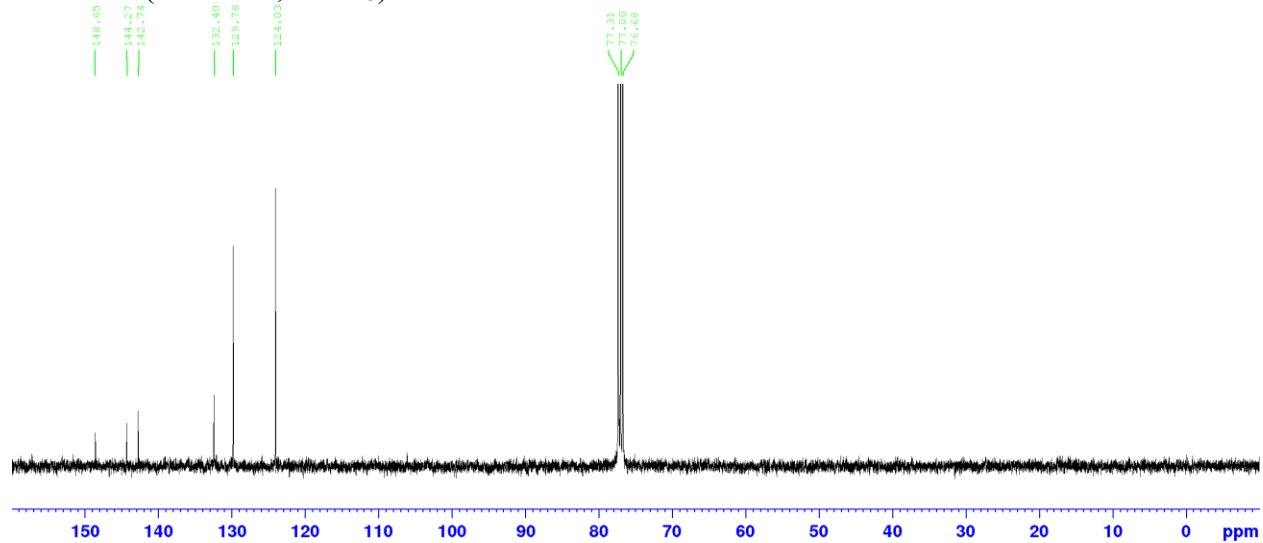

2-bromo-*p*-methylacetophenone **6a**:

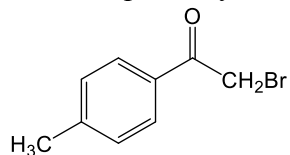

$^1\text{H NMR}$  (400 MHz,  $\text{CDCl}_3$ )

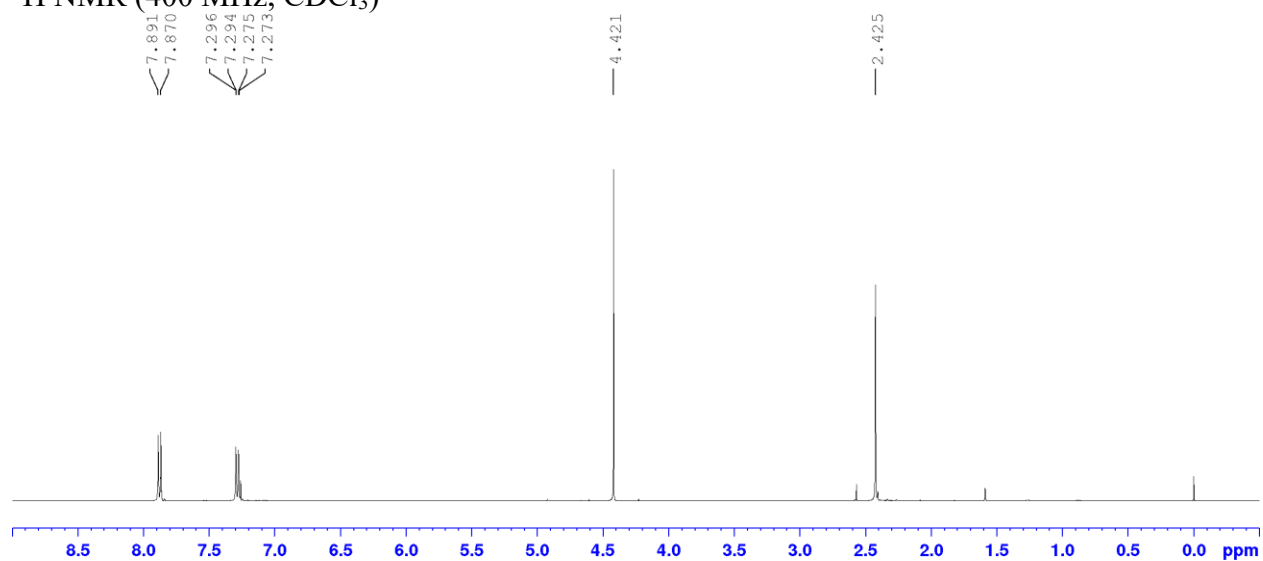

$^{13}\text{C NMR}$  (101 MHz,  $\text{CDCl}_3$ )

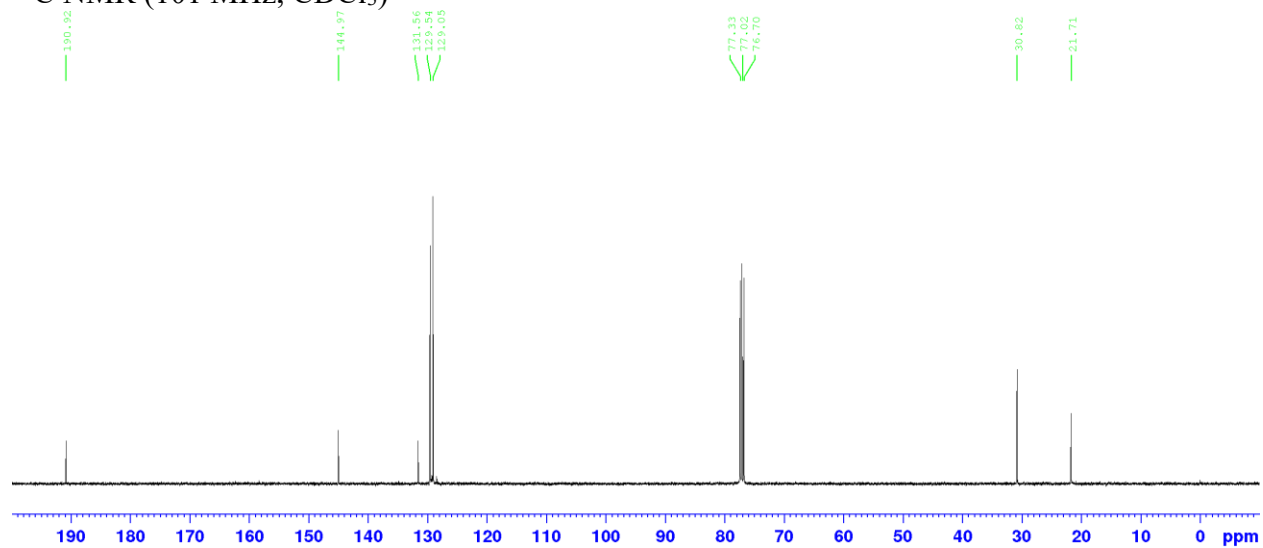

2-bromo-*p*-nitroacetophenone **6b**:

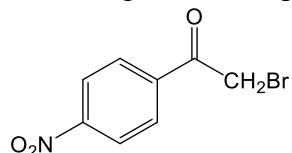

$^1\text{H}$  NMR (400 MHz,  $\text{CDCl}_3$ )

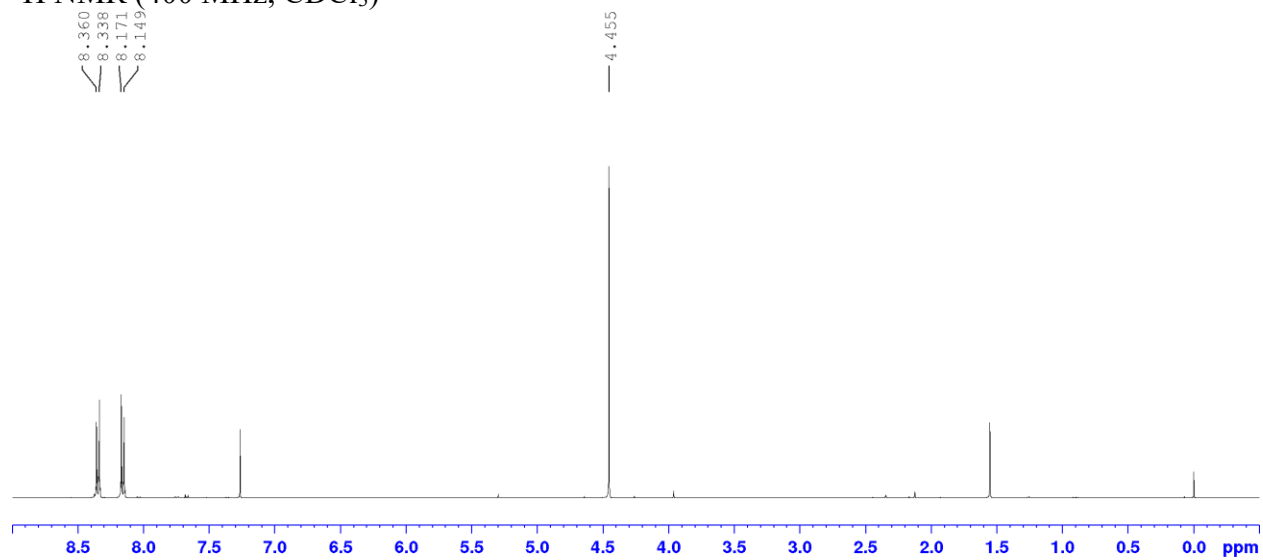

$^{13}\text{C}$  NMR (101 MHz,  $\text{CDCl}_3$ )

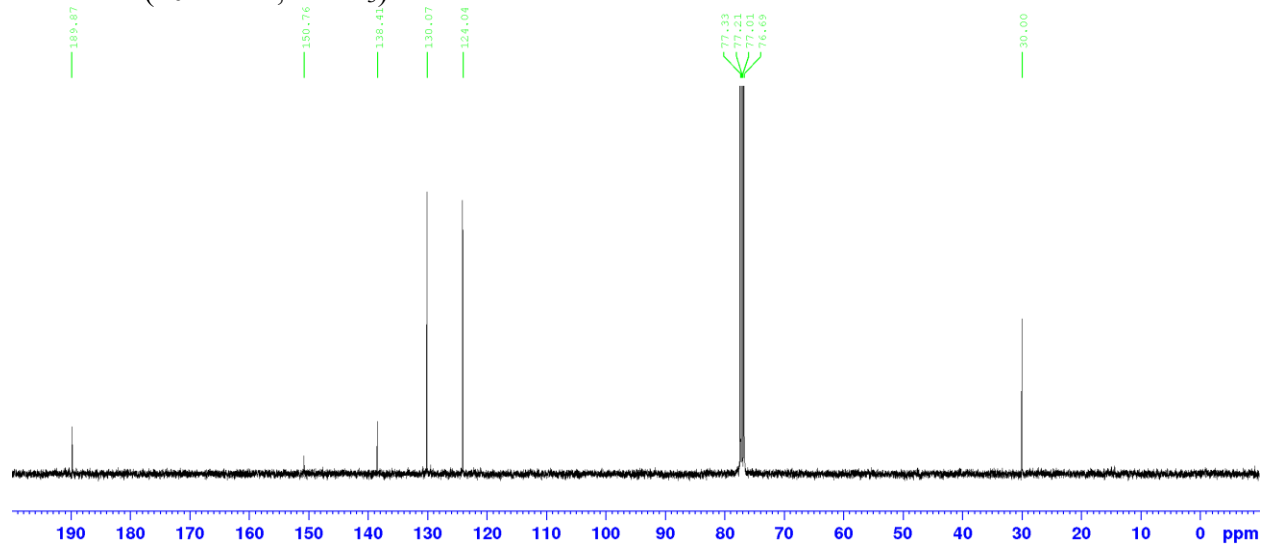

(Z)-1,2-dibromo-*p*-methylstyrene 7:

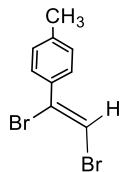

$^1\text{H NMR}$  (400 MHz,  $\text{CDCl}_3$ )

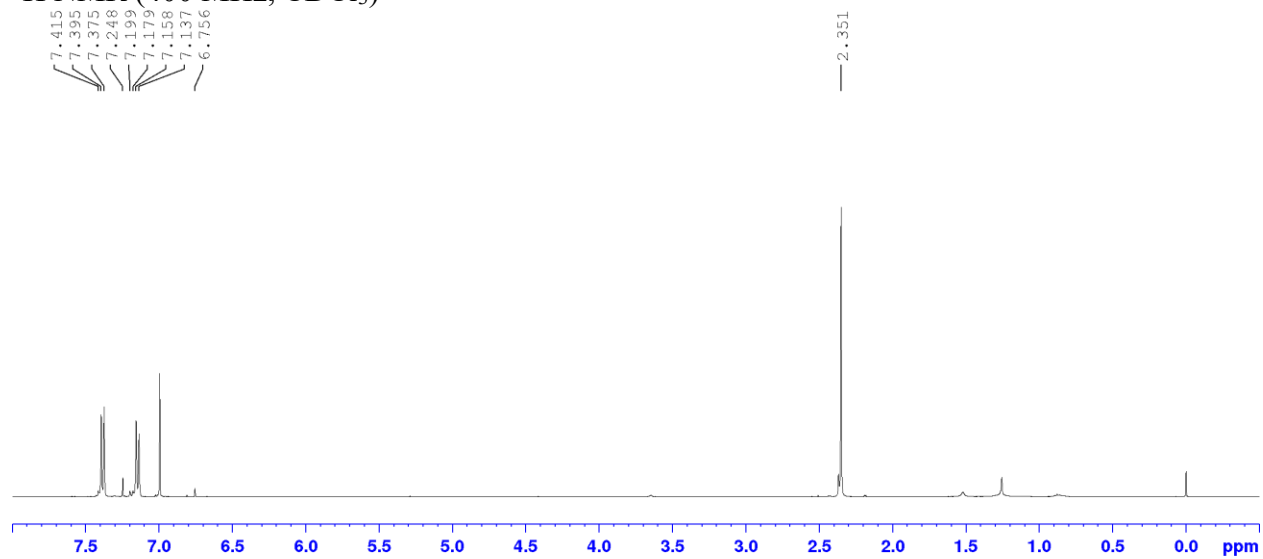

$^{13}\text{C NMR}$  (101 MHz,  $\text{CDCl}_3$ )

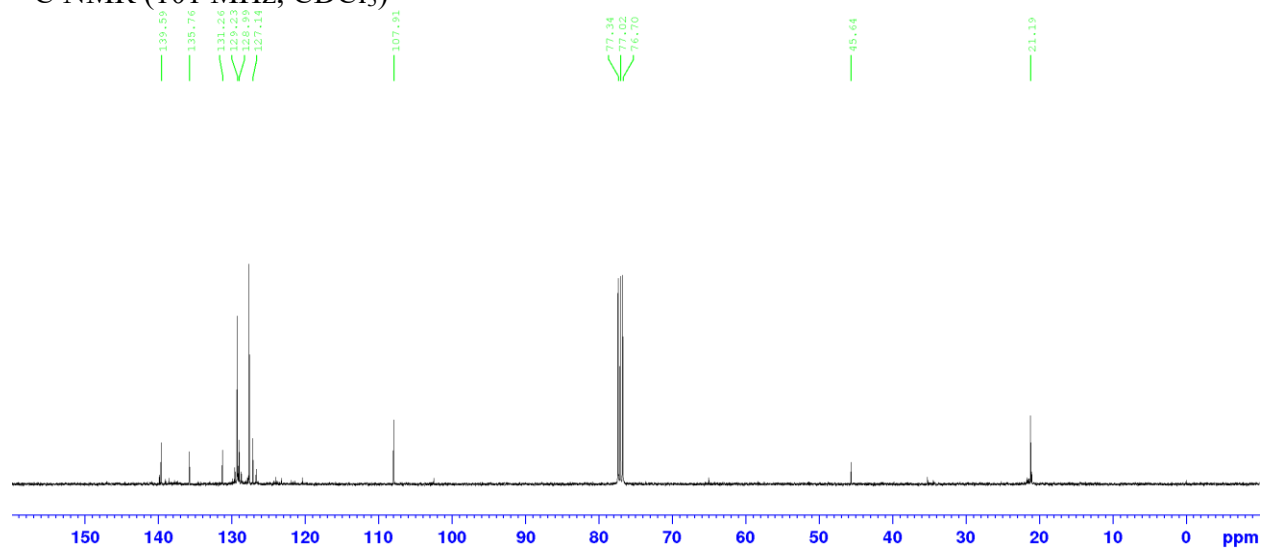

1-nitro-4-(1,1,2-tribromoethyl)benzene **8**:

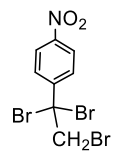

$^1\text{H}$  NMR (400 MHz,  $\text{CDCl}_3$ )

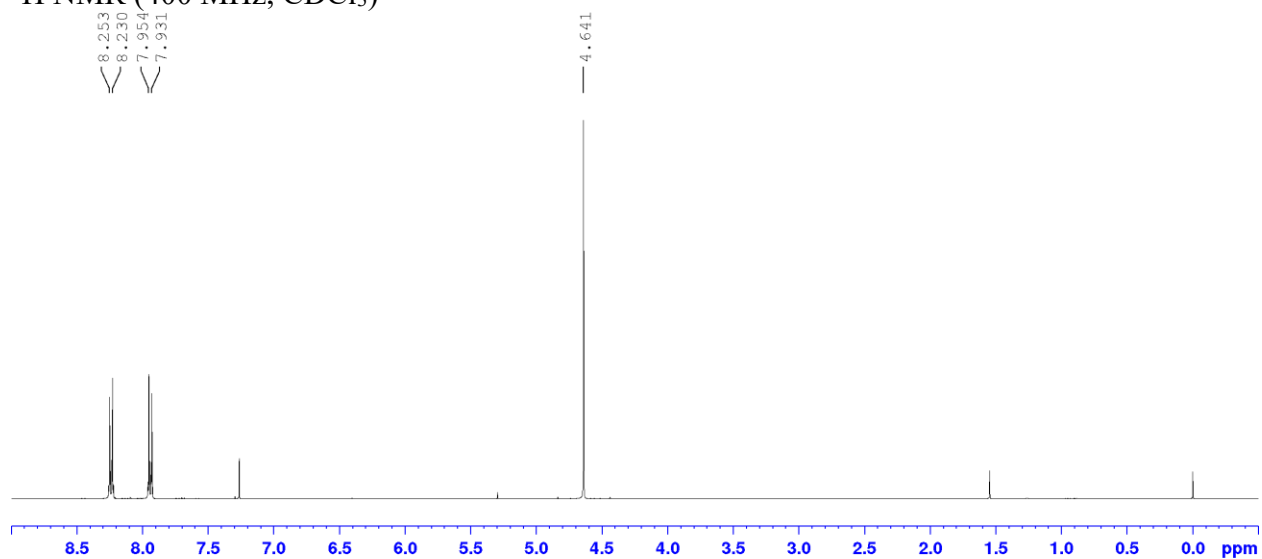

$^{13}\text{C}$  NMR (101 MHz,  $\text{CDCl}_3$ )

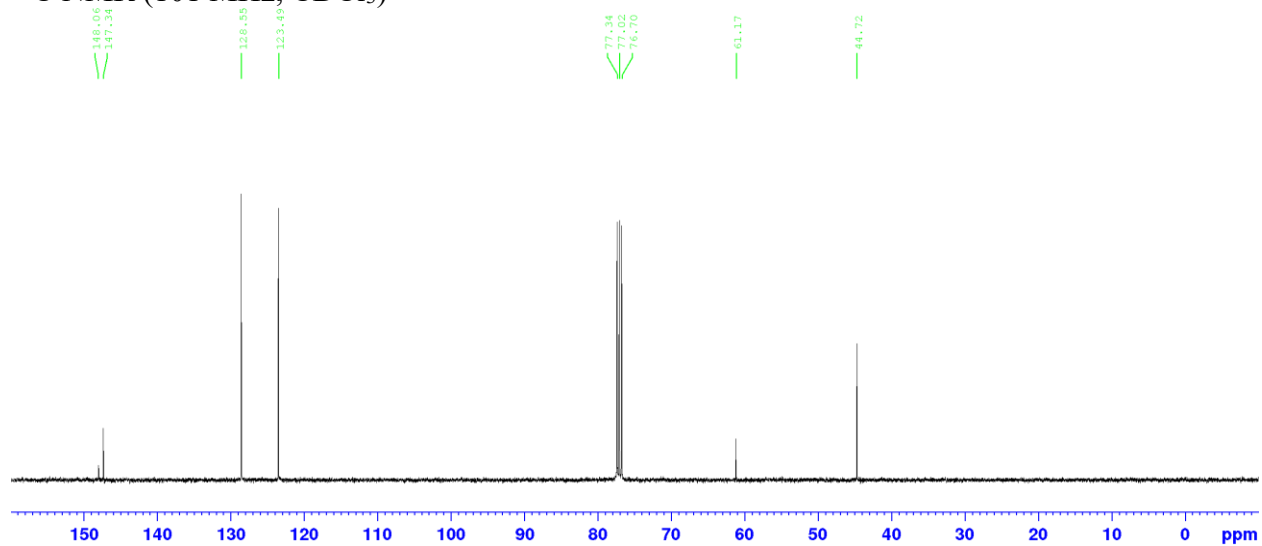

*p*-methylacetophenone (Oxidation of Dibromide)

$^1\text{H}$  NMR (400 MHz,  $\text{CDCl}_3$ )

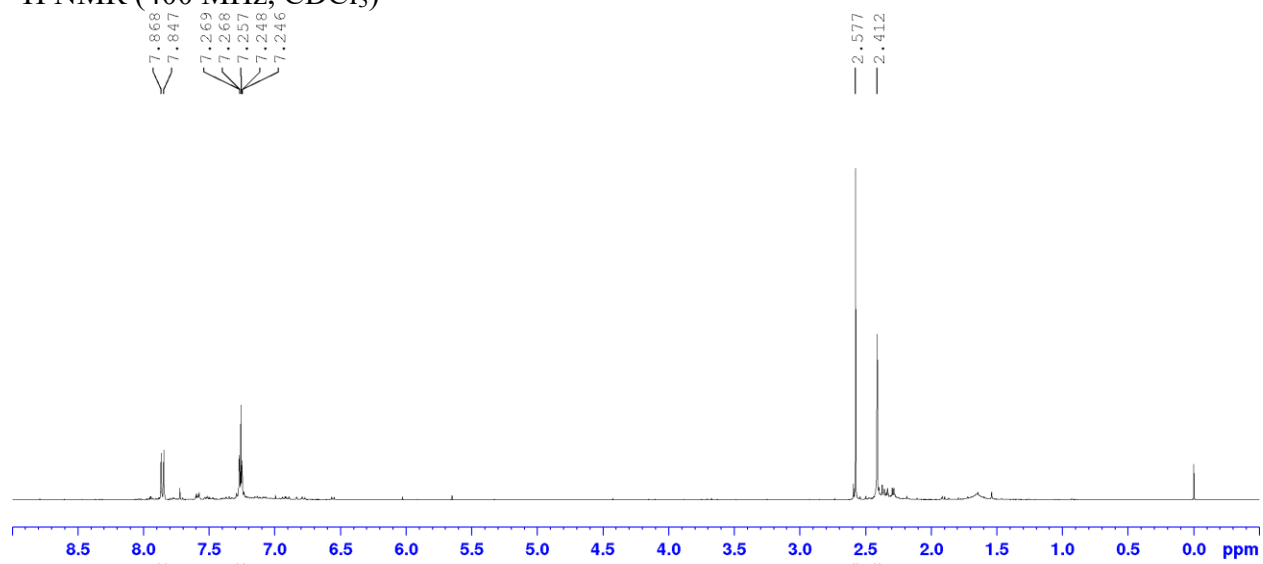

$^{13}\text{C}$  NMR (101 MHz,  $\text{CDCl}_3$ )

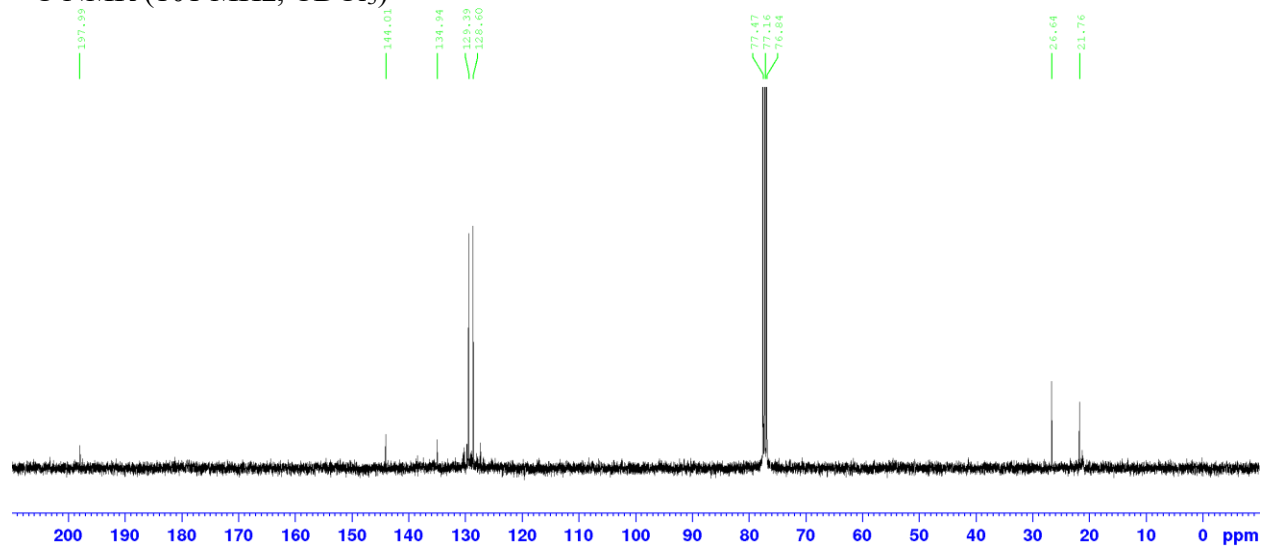



(*E*)-(2-(4-methylstyryl)phenyl)(1-(*p*-tolyl)vinyl)telluride **10a**:

Compound **10** is unstable. Upon standing at rt for 6 h, compound **10a** decomposed to give undefined species.

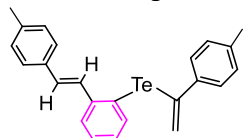

$^1\text{H NMR}$  (400 MHz,  $\text{CDCl}_3$ )

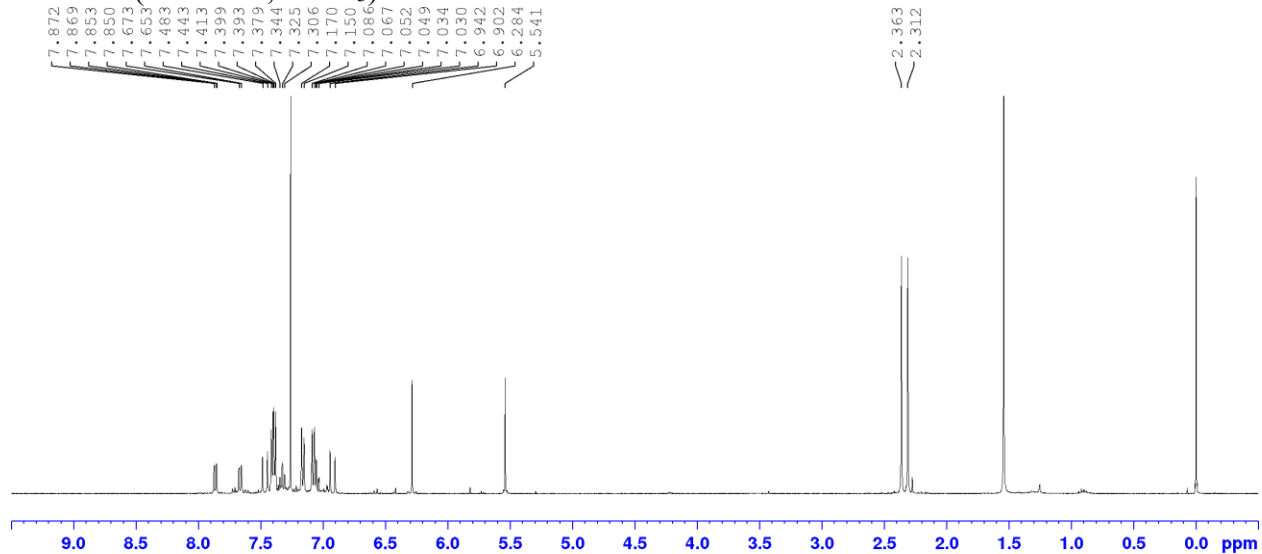

$^{13}\text{C NMR}$  (101 MHz,  $\text{CDCl}_3$ )

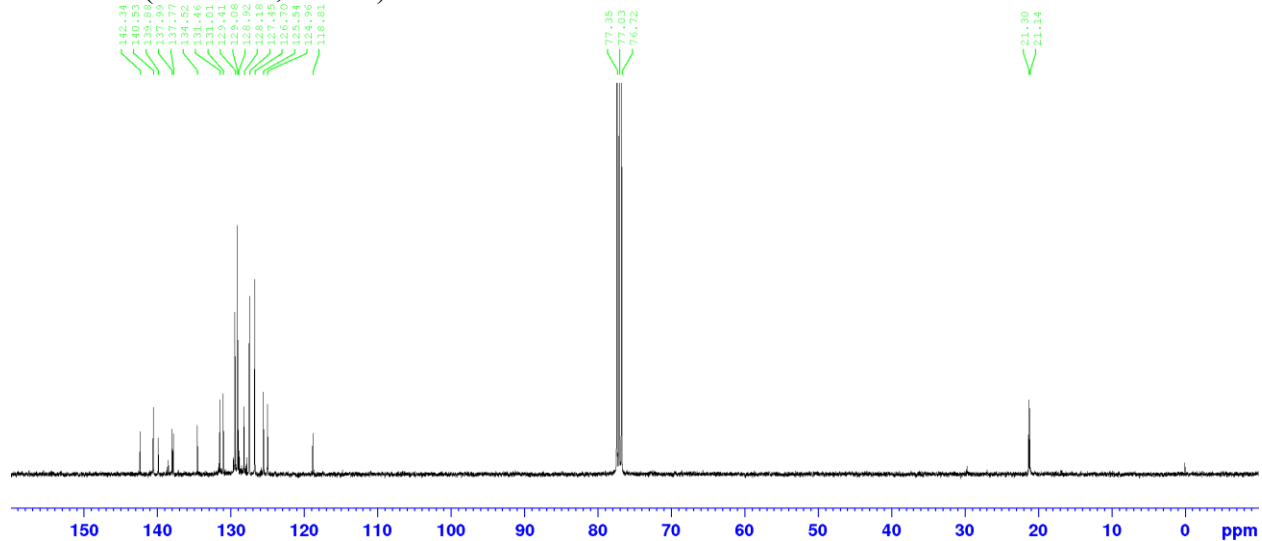

Bis(2-((*E*)-4-methylstyryl)phenyl) telluride **11a**:

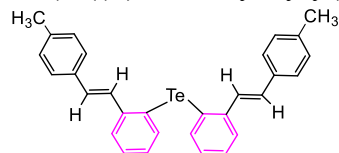

$^1\text{H NMR}$  (400 MHz,  $\text{CDCl}_3$ )

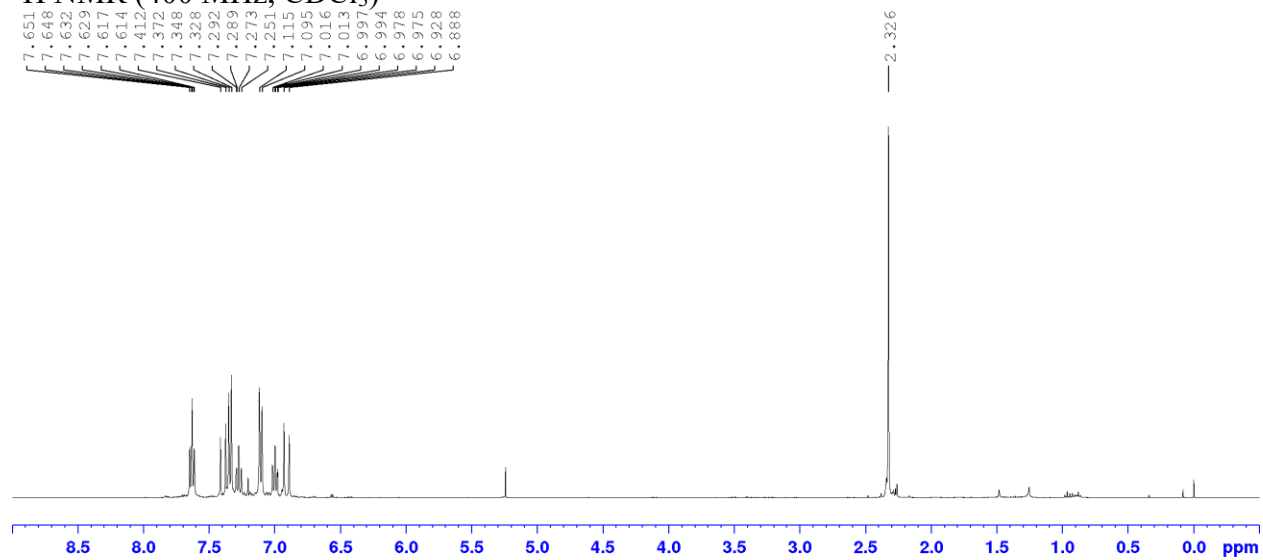

$^{13}\text{C NMR}$  (101 MHz,  $\text{CDCl}_3$ )

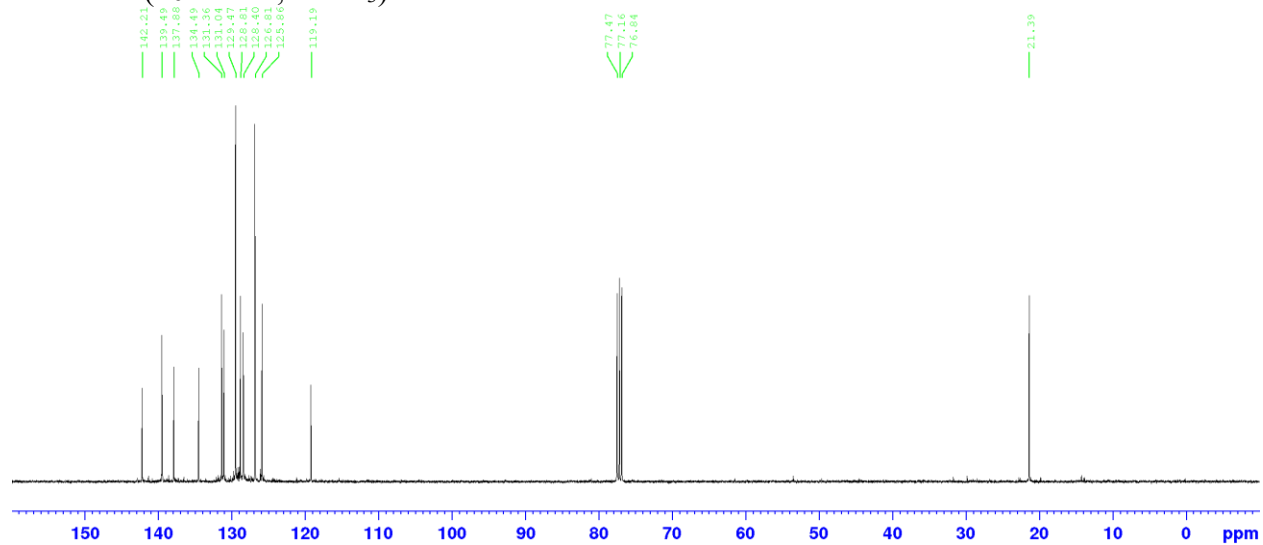

Deuterated Compound **11a-D** (60%D):

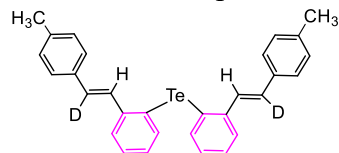

$^1\text{H}$  NMR (400 MHz,  $\text{CDCl}_3$ )

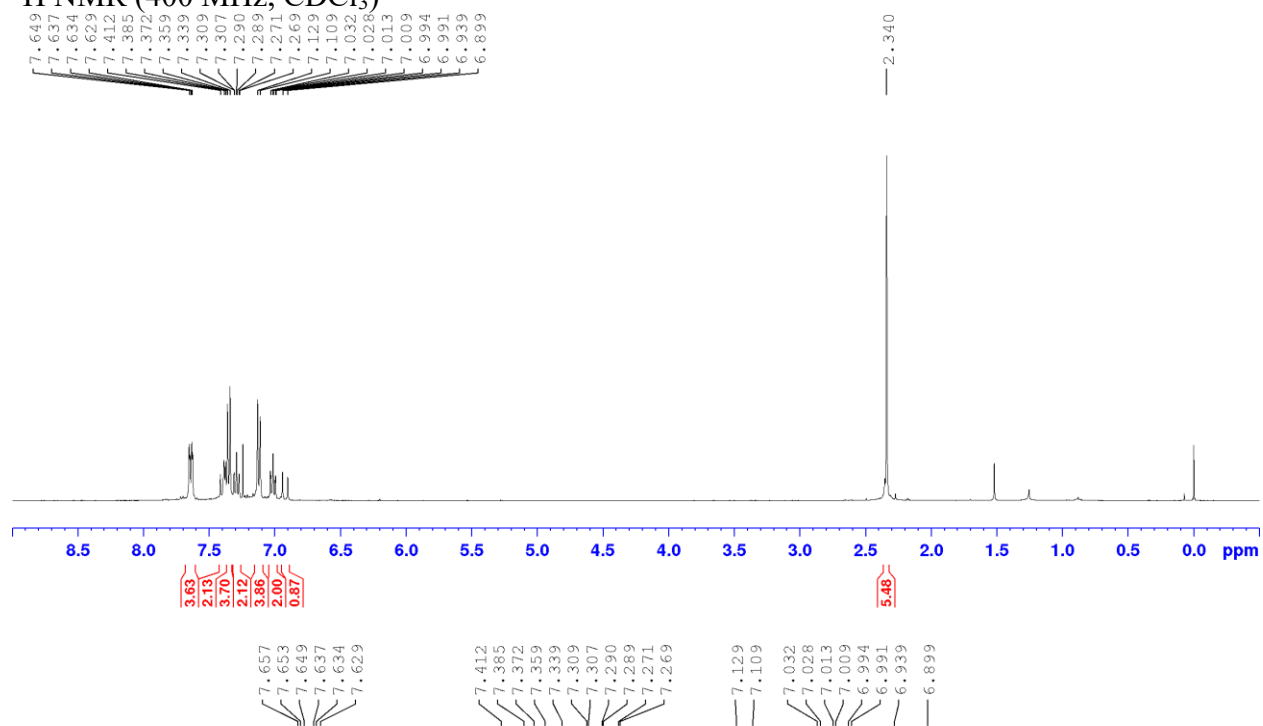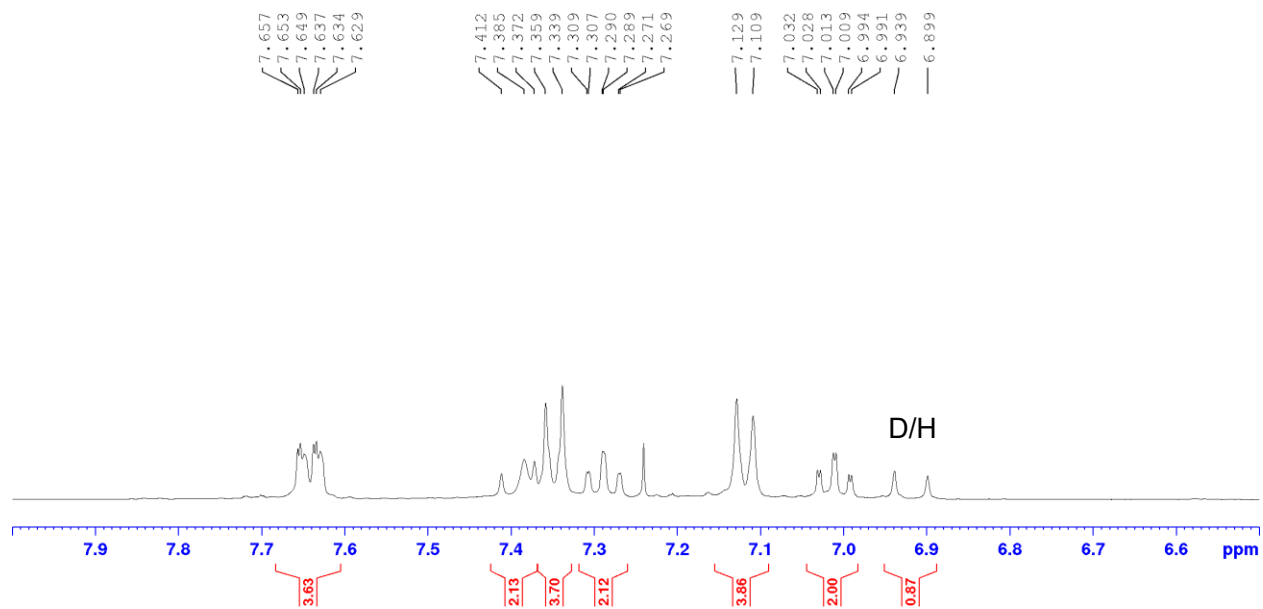

Bis(2-((*E*)-styryl)phenyl) telluride **11b**:

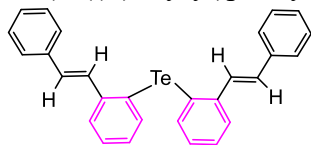

$^1\text{H}$  NMR (400 MHz,  $\text{CDCl}_3$ )

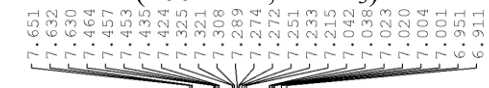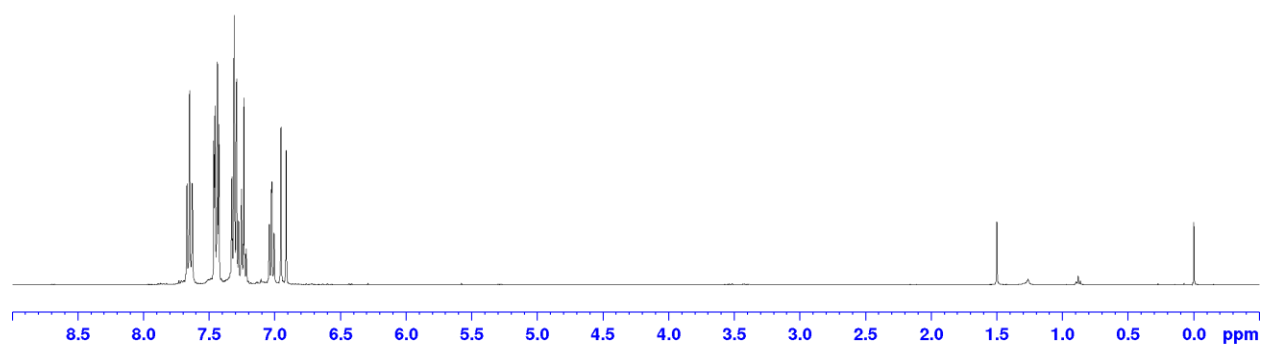

$^{13}\text{C}$  NMR (101 MHz,  $\text{CDCl}_3$ )

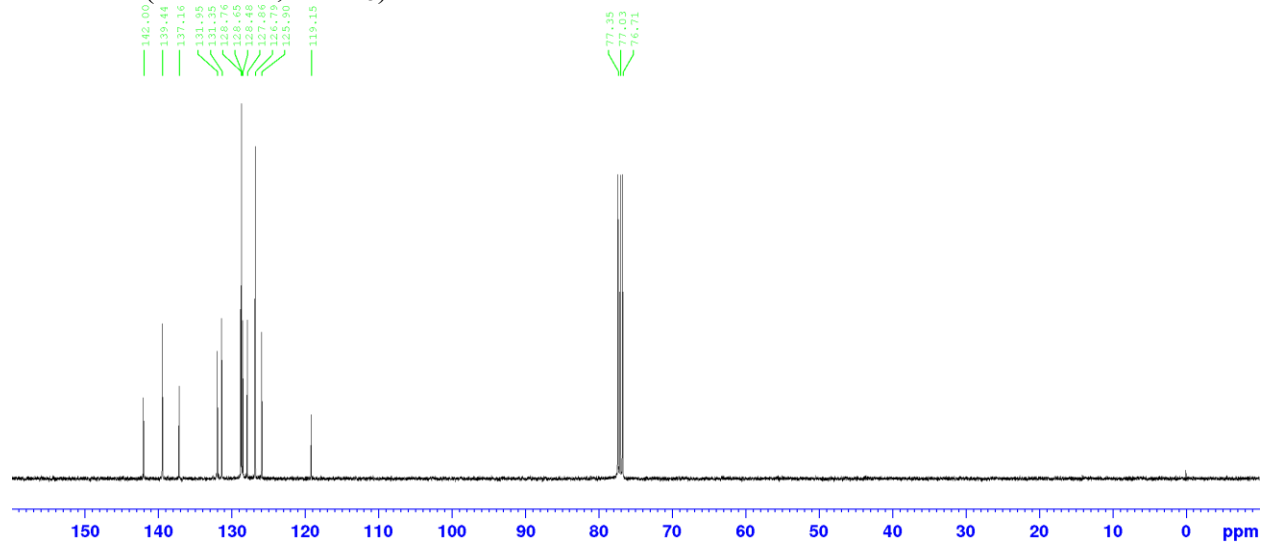

Bis(2-((E)-4-chlorostyryl)phenyl) telluride **11c**:

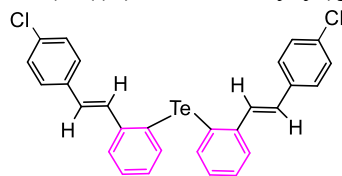

$^1\text{H}$  NMR (400 MHz,  $\text{CDCl}_3$ )

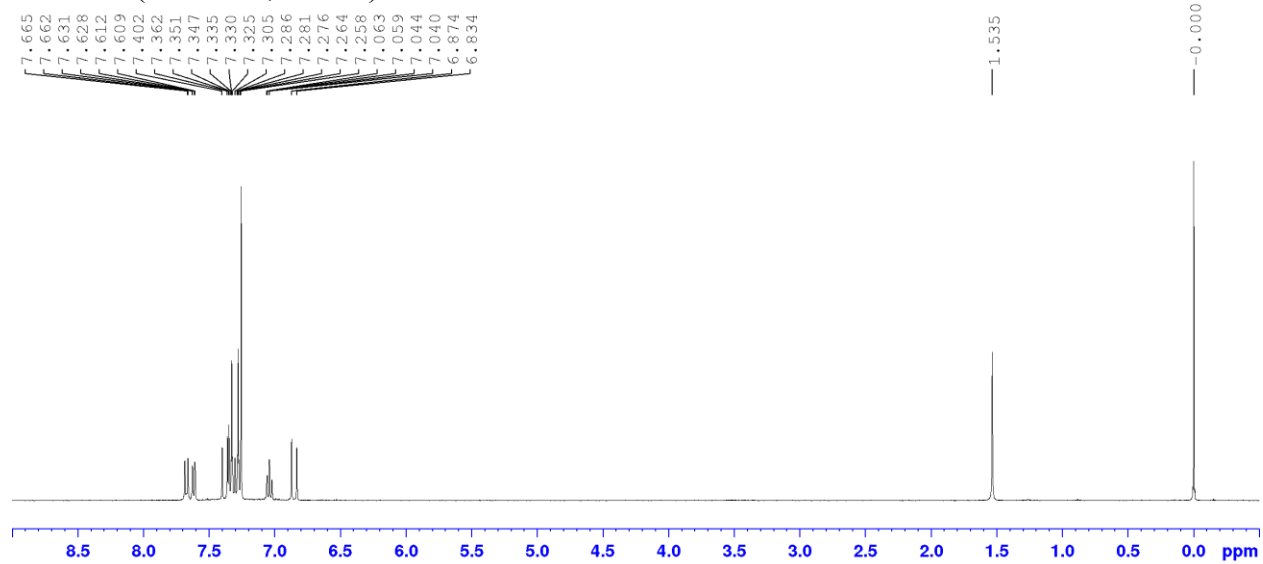

$^{13}\text{C}$  NMR (101 MHz,  $\text{CDCl}_3$ )

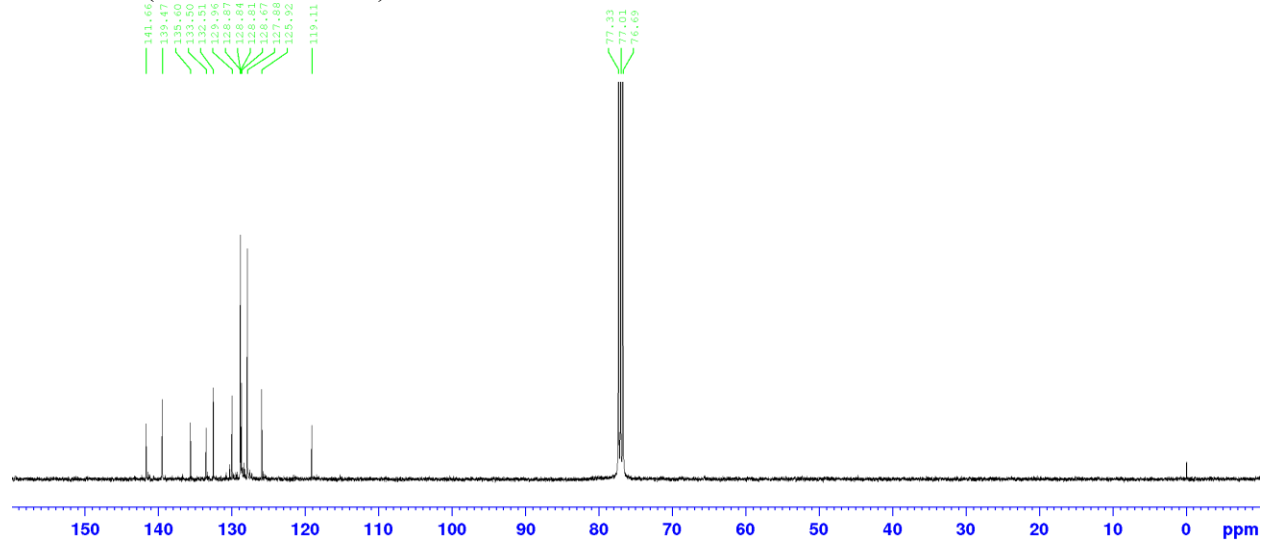

Bis(2-((*E*)-4-bromostyryl)phenyl) telluride **11d**:

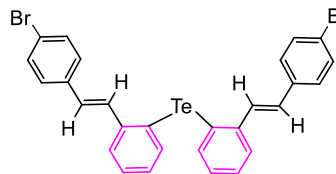

$^1\text{H NMR}$  (400 MHz,  $\text{CDCl}_3$ )

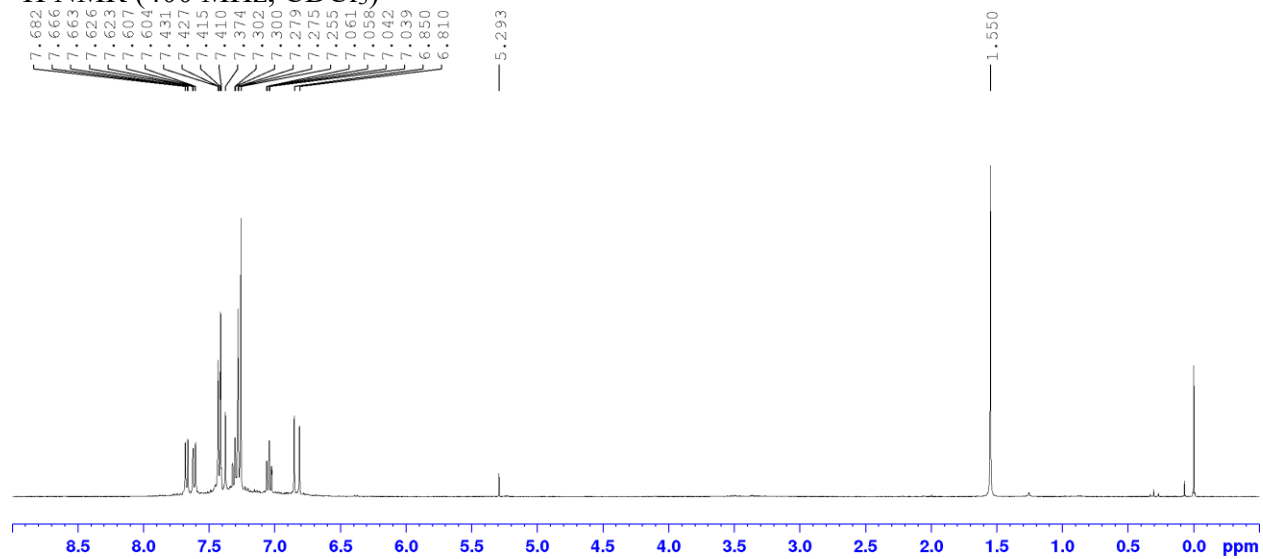

$^{13}\text{C NMR}$  (101 MHz,  $\text{CDCl}_3$ )

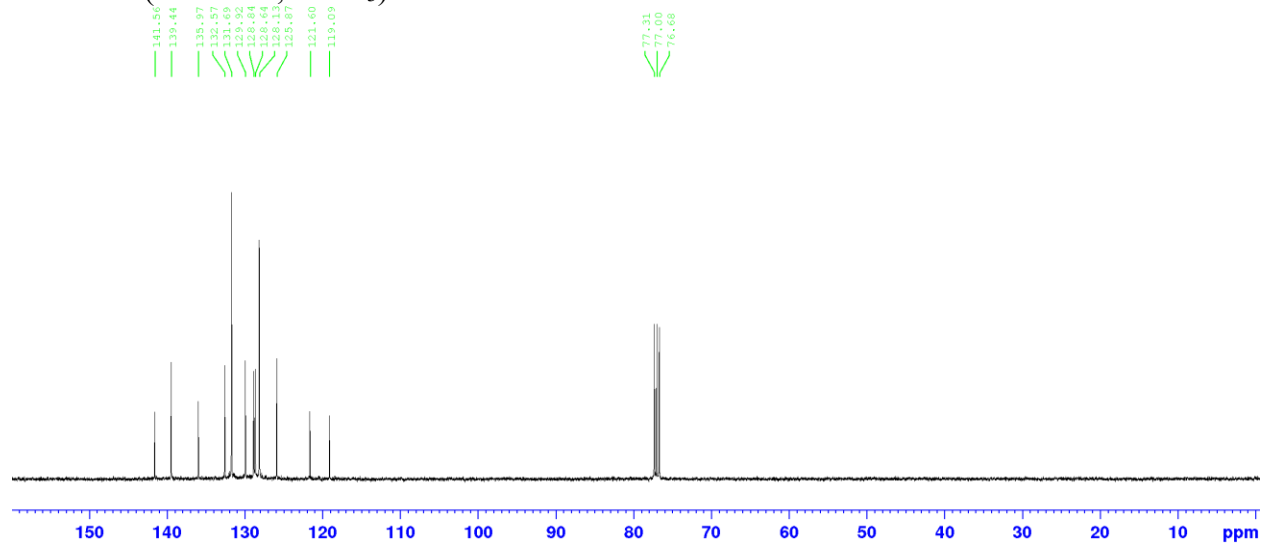

Bis(2-((*E*)-4-phenylstyryl)phenyl) telluride **11f**:

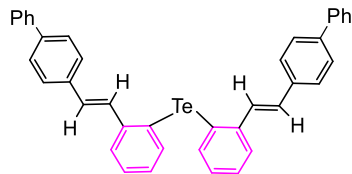

$^1\text{H}$  NMR (400 MHz,  $\text{CDCl}_3$ )

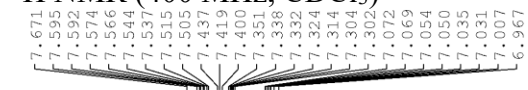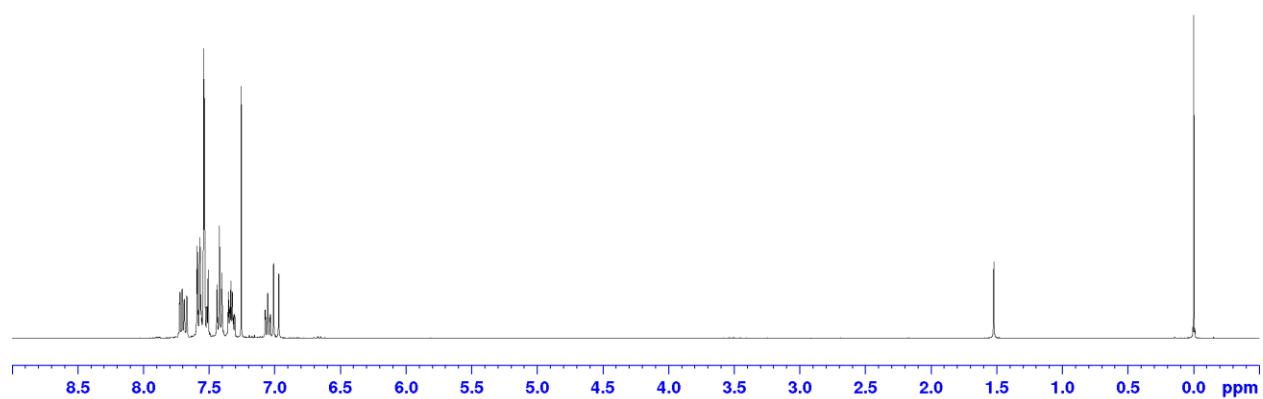

$^{13}\text{C}$  NMR (101 MHz,  $\text{CDCl}_3$ )

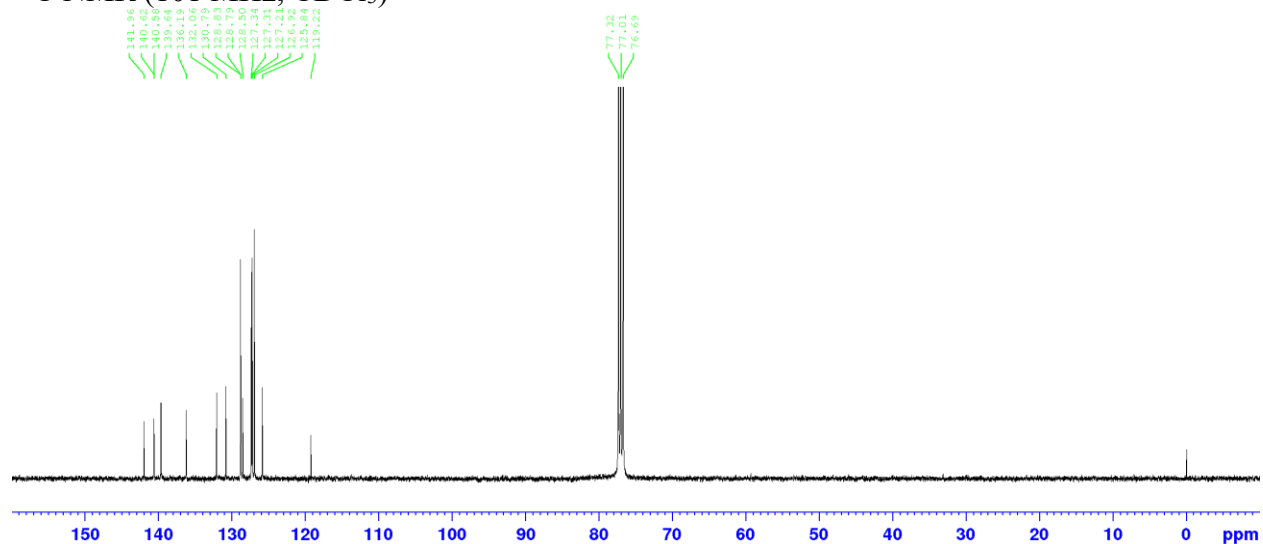

Bis(2-((*E*)-2-methylstyryl)phenyl) telluride **11g**:

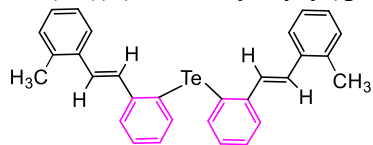

$^1\text{H}$  NMR (400 MHz,  $\text{CDCl}_3$ )

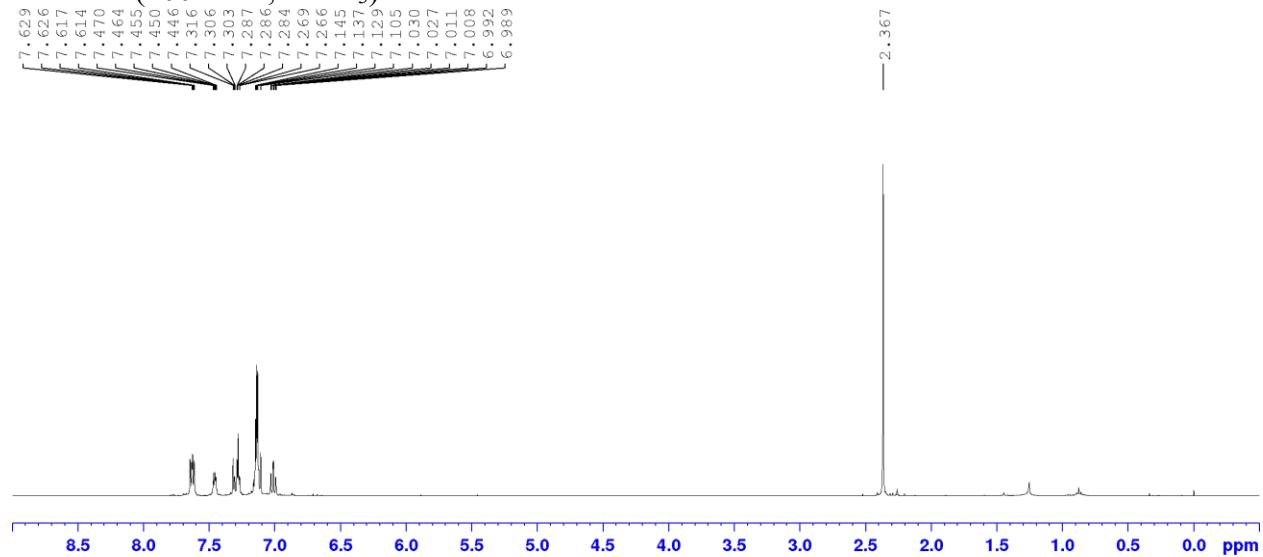

$^{13}\text{C}$  NMR (101 MHz,  $\text{CDCl}_3$ )

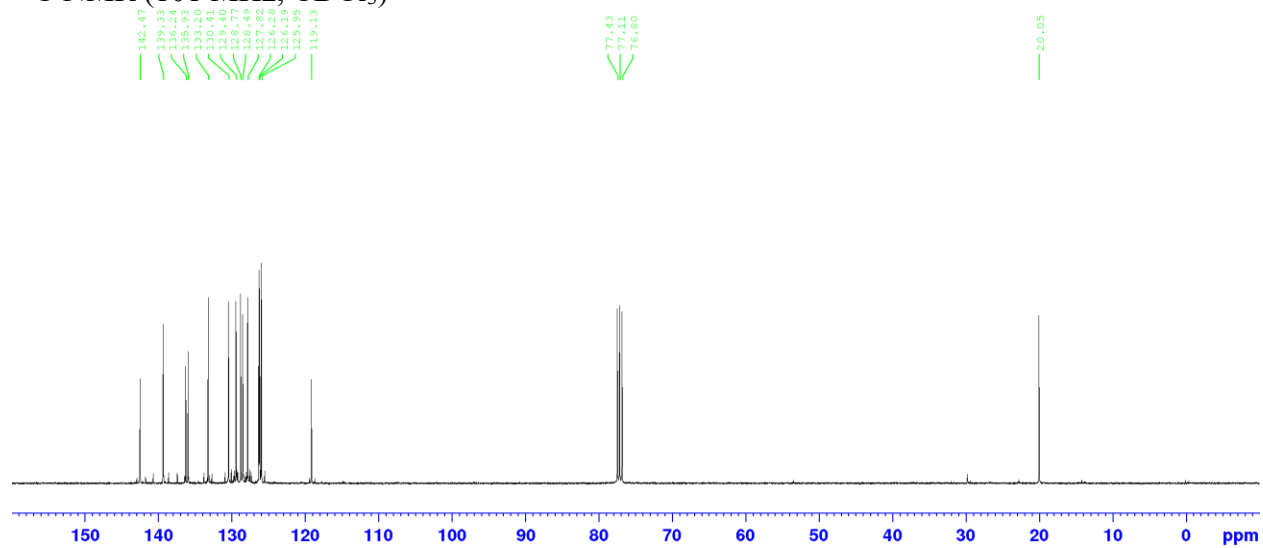



Figure 1. ORTEP Drawing for 1-nitro-4-(1,1,2-tribromoethyl)benzene **8**.

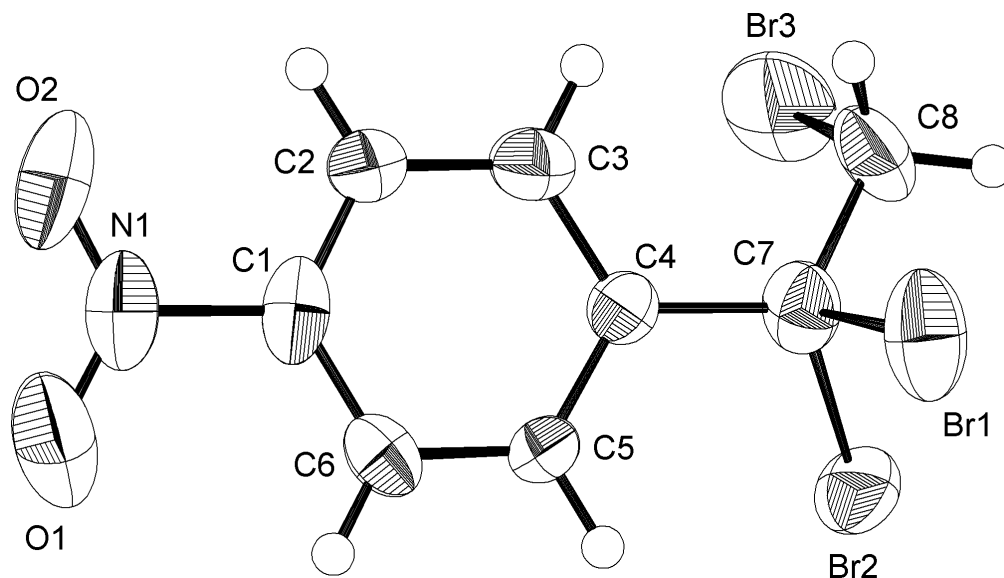

Table 1. Crystal data and structure refinement for 1-nitro-4-(1,1,2-tribromoethyl)benzene **8**.

|                                 |                                                                               |                             |
|---------------------------------|-------------------------------------------------------------------------------|-----------------------------|
| Identification code             | 20200111                                                                      |                             |
| Empirical formula               | C <sub>16</sub> H <sub>12</sub> Br <sub>6</sub> N <sub>2</sub> O <sub>4</sub> |                             |
| Formula weight                  | 775.74                                                                        |                             |
| Temperature                     | 293(2) K                                                                      |                             |
| Wavelength                      | 0.71075 Å                                                                     |                             |
| Crystal system                  | monoclinic                                                                    |                             |
| Space group                     | <i>P</i> <sub>2</sub> <sub>1</sub> / <i>a</i>                                 |                             |
| Unit cell dimensions            | <i>a</i> = 7.012(2) Å                                                         | $\alpha = 90^\circ$ .       |
|                                 | <i>b</i> = 19.312(7) Å                                                        | $\beta = 90.125(7)^\circ$ . |
|                                 | <i>c</i> = 16.460(6) Å                                                        | $\gamma = 90^\circ$ .       |
| Volume                          | 2228.9(14) Å <sup>3</sup>                                                     |                             |
| <i>Z</i>                        | 4                                                                             |                             |
| Density (calculated)            | 2.312 Mg/m <sup>3</sup>                                                       |                             |
| Absorption coefficient          | 10.832 mm <sup>-1</sup>                                                       |                             |
| <i>F</i> (000)                  | 1456                                                                          |                             |
| Crystal size                    | 0.35 x 0.20 x 0.10 mm <sup>3</sup>                                            |                             |
| Theta range for data collection | 3.09 to 26.00°.                                                               |                             |
| Index ranges                    | -8 ≤ <i>h</i> ≤ 8, -23 ≤ <i>k</i> ≤ 23, -20 ≤ <i>l</i> ≤ 20                   |                             |

|                                   |                                             |
|-----------------------------------|---------------------------------------------|
| Reflections collected             | 23139                                       |
| Independent reflections           | 4389 [R(int) = 0.1277]                      |
| Completeness to theta = 26.00°    | 99.9 %                                      |
| Max. and min. transmission        | 0.4105 and 0.1158                           |
| Refinement method                 | Full-matrix least-squares on F <sup>2</sup> |
| Data / restraints / parameters    | 4389 / 0 / 253                              |
| Goodness-of-fit on F <sup>2</sup> | 1.010                                       |
| Final R indices [I > 2sigma(I)]   | R1 = 0.0581, wR2 = 0.0881                   |
| R indices (all data)              | R1 = 0.0951, wR2 = 0.0939                   |
| Largest diff. peak and hole       | 0.992 and -1.285 e.Å <sup>-3</sup>          |

Table 2. Atomic coordinates ( $\times 10^4$ ) and equivalent isotropic displacement parameters ( $\text{\AA}^2 \times 10^3$ ) for 20200111.  $U(\text{eq})$  is defined as one third of the trace of the orthogonalized  $U^{ij}$  tensor.

|       | x         | y        | z       | $U(\text{eq})$ |
|-------|-----------|----------|---------|----------------|
| C(1)  | 7468(10)  | 2601(5)  | 7285(5) | 49(2)          |
| C(2)  | 7537(9)   | 1921(5)  | 7078(5) | 47(2)          |
| C(3)  | 7345(9)   | 1422(4)  | 7685(4) | 51(2)          |
| C(4)  | 7098(9)   | 1615(4)  | 8489(4) | 39(2)          |
| C(5)  | 7028(9)   | 2306(4)  | 8657(4) | 41(2)          |
| C(6)  | 7211(9)   | 2807(4)  | 8079(5) | 45(2)          |
| N(1)  | 7644(10)  | 3118(5)  | 6640(5) | 64(2)          |
| O(1)  | 7386(10)  | 3715(4)  | 6807(5) | 99(3)          |
| O(2)  | 8053(9)   | 2920(4)  | 5967(4) | 99(3)          |
| C(7)  | 6955(9)   | 1087(5)  | 9151(4) | 50(2)          |
| C(8)  | 6723(10)  | 339(4)   | 8915(5) | 63(2)          |
| Br(1) | 9428(1)   | 1081(1)  | 9745(1) | 77(1)          |
| Br(2) | 4988(1)   | 1328(1)  | 9927(1) | 57(1)          |
| Br(3) | 4268(1)   | 199(1)   | 8367(1) | 90(1)          |
| C(9)  | 12469(9)  | -2594(5) | 7708(5) | 45(2)          |
| C(10) | 12540(10) | -1922(5) | 7923(4) | 50(2)          |
| C(11) | 12344(9)  | -1416(4) | 7325(5) | 50(2)          |
| C(12) | 12096(9)  | -1616(4) | 6516(4) | 36(2)          |
| C(13) | 12051(9)  | -2302(4) | 6332(4) | 40(2)          |
| C(14) | 12225(9)  | -2797(4) | 6917(5) | 41(2)          |
| N(2)  | 12651(10) | -3113(5) | 8356(5) | 63(2)          |
| O(3)  | 12414(10) | -3715(4) | 8190(4) | 95(3)          |
| O(4)  | 13055(8)  | -2929(4) | 9031(4) | 94(3)          |
| C(15) | 11971(9)  | -1078(4) | 5855(4) | 47(2)          |
| C(16) | 11720(10) | -337(4)  | 6100(5) | 65(3)          |
| Br(4) | 14425(1)  | -1081(1) | 5255(1) | 75(1)          |
| Br(5) | 9987(1)   | -1328(1) | 5074(1) | 58(1)          |
| Br(6) | 9265(1)   | -200(1)  | 6633(1) | 89(1)          |

Table 3. Bond lengths [Å] and angles [°] for 20200111.

|                |           |                |           |
|----------------|-----------|----------------|-----------|
| C(1)-C(2)      | 1.357(10) | C(9)-C(10)     | 1.347(10) |
| C(1)-C(6)      | 1.378(10) | C(9)-C(14)     | 1.368(9)  |
| C(1)-N(1)      | 1.463(10) | C(9)-N(2)      | 1.469(10) |
| C(2)-C(3)      | 1.395(9)  | C(10)-C(11)    | 1.394(9)  |
| C(2)-H(1)      | 0.9300    | C(10)-H(7)     | 0.9300    |
| C(3)-C(4)      | 1.387(9)  | C(11)-C(12)    | 1.396(9)  |
| C(3)-H(2)      | 0.9300    | C(11)-H(8)     | 0.9300    |
| C(4)-C(5)      | 1.363(9)  | C(12)-C(13)    | 1.360(9)  |
| C(4)-C(7)      | 1.497(9)  | C(12)-C(15)    | 1.507(9)  |
| C(5)-C(6)      | 1.363(9)  | C(13)-C(14)    | 1.362(9)  |
| C(5)-H(3)      | 0.9300    | C(13)-H(9)     | 0.9300    |
| C(6)-H(4)      | 0.9300    | C(14)-H(10)    | 0.9300    |
| N(1)-O(1)      | 1.199(9)  | N(2)-O(4)      | 1.201(9)  |
| N(1)-O(2)      | 1.207(9)  | N(2)-O(3)      | 1.206(9)  |
| C(7)-C(8)      | 1.505(10) | C(15)-C(16)    | 1.497(10) |
| C(7)-Br(2)     | 1.939(7)  | C(15)-Br(5)    | 1.953(7)  |
| C(7)-Br(1)     | 1.989(7)  | C(15)-Br(4)    | 1.986(7)  |
| C(8)-Br(3)     | 1.961(7)  | C(16)-Br(6)    | 1.952(7)  |
| C(8)-H(5)      | 0.9700    | C(16)-H(11)    | 0.9700    |
| C(8)-H(6)      | 0.9700    | C(16)-H(12)    | 0.9700    |
|                |           |                |           |
| C(2)-C(1)-C(6) | 121.5(8)  | C(3)-C(4)-C(7) | 121.4(8)  |
| C(2)-C(1)-N(1) | 118.4(9)  | C(4)-C(5)-C(6) | 123.3(8)  |
| C(6)-C(1)-N(1) | 120.2(9)  | C(4)-C(5)-H(3) | 118.4     |
| C(1)-C(2)-C(3) | 119.0(8)  | C(6)-C(5)-H(3) | 118.4     |
| C(1)-C(2)-H(1) | 120.5     | C(5)-C(6)-C(1) | 118.1(8)  |
| C(3)-C(2)-H(1) | 120.5     | C(5)-C(6)-H(4) | 121.0     |
| C(4)-C(3)-C(2) | 120.7(8)  | C(1)-C(6)-H(4) | 121.0     |
| C(4)-C(3)-H(2) | 119.7     | O(1)-N(1)-O(2) | 123.4(10) |
| C(2)-C(3)-H(2) | 119.7     | O(1)-N(1)-C(1) | 118.5(10) |
| C(5)-C(4)-C(3) | 117.5(7)  | O(2)-N(1)-C(1) | 118.0(10) |
| C(5)-C(4)-C(7) | 121.1(7)  | C(4)-C(7)-C(8) | 118.3(7)  |

|                   |          |                   |          |
|-------------------|----------|-------------------|----------|
| C(4)-C(7)-Br(2)   | 111.4(6) | C(16)-C(15)-Br(5) | 109.2(5) |
| C(8)-C(7)-Br(2)   | 108.9(5) | C(12)-C(15)-Br(5) | 110.2(5) |
| C(4)-C(7)-Br(1)   | 107.5(5) | C(16)-C(15)-Br(4) | 103.9(5) |
| C(8)-C(7)-Br(1)   | 102.4(5) | C(12)-C(15)-Br(4) | 107.9(5) |
| Br(2)-C(7)-Br(1)  | 107.4(3) | Br(5)-C(15)-Br(4) | 106.8(3) |
| C(7)-C(8)-Br(3)   | 110.2(5) | C(15)-C(16)-Br(6) | 110.8(5) |
| C(7)-C(8)-H(5)    | 109.6    | C(15)-C(16)-H(11) | 109.5    |
| Br(3)-C(8)-H(5)   | 109.6    | Br(6)-C(16)-H(11) | 109.5    |
| C(7)-C(8)-H(6)    | 109.6    | C(15)-C(16)-H(12) | 109.5    |
| Br(3)-C(8)-H(6)   | 109.6    | Br(6)-C(16)-H(12) | 109.5    |
| H(5)-C(8)-H(6)    | 108.1    | H(11)-C(16)-H(12) | 108.1    |
| C(10)-C(9)-C(14)  | 122.0(8) |                   |          |
| C(10)-C(9)-N(2)   | 117.6(8) |                   |          |
| C(14)-C(9)-N(2)   | 120.4(9) |                   |          |
| C(9)-C(10)-C(11)  | 119.1(8) |                   |          |
| C(9)-C(10)-H(7)   | 120.4    |                   |          |
| C(11)-C(10)-H(7)  | 120.4    |                   |          |
| C(10)-C(11)-C(12) | 119.4(8) |                   |          |
| C(10)-C(11)-H(8)  | 120.3    |                   |          |
| C(12)-C(11)-H(8)  | 120.3    |                   |          |
| C(13)-C(12)-C(11) | 119.0(7) |                   |          |
| C(13)-C(12)-C(15) | 120.7(7) |                   |          |
| C(11)-C(12)-C(15) | 120.3(7) |                   |          |
| C(12)-C(13)-C(14) | 121.6(7) |                   |          |
| C(12)-C(13)-H(9)  | 119.2    |                   |          |
| C(14)-C(13)-H(9)  | 119.2    |                   |          |
| C(13)-C(14)-C(9)  | 118.9(8) |                   |          |
| C(13)-C(14)-H(10) | 120.6    |                   |          |
| C(9)-C(14)-H(10)  | 120.6    |                   |          |
| O(4)-N(2)-O(3)    | 121.8(9) |                   |          |
| O(4)-N(2)-C(9)    | 119.4(9) |                   |          |
| O(3)-N(2)-C(9)    | 118.8(9) |                   |          |
| C(16)-C(15)-C(12) | 118.1(7) |                   |          |

---

Symmetry transformations used to generate equivalent atoms:

Figure 2. ORTEP drawing for Tellurium dibromide **5e**.

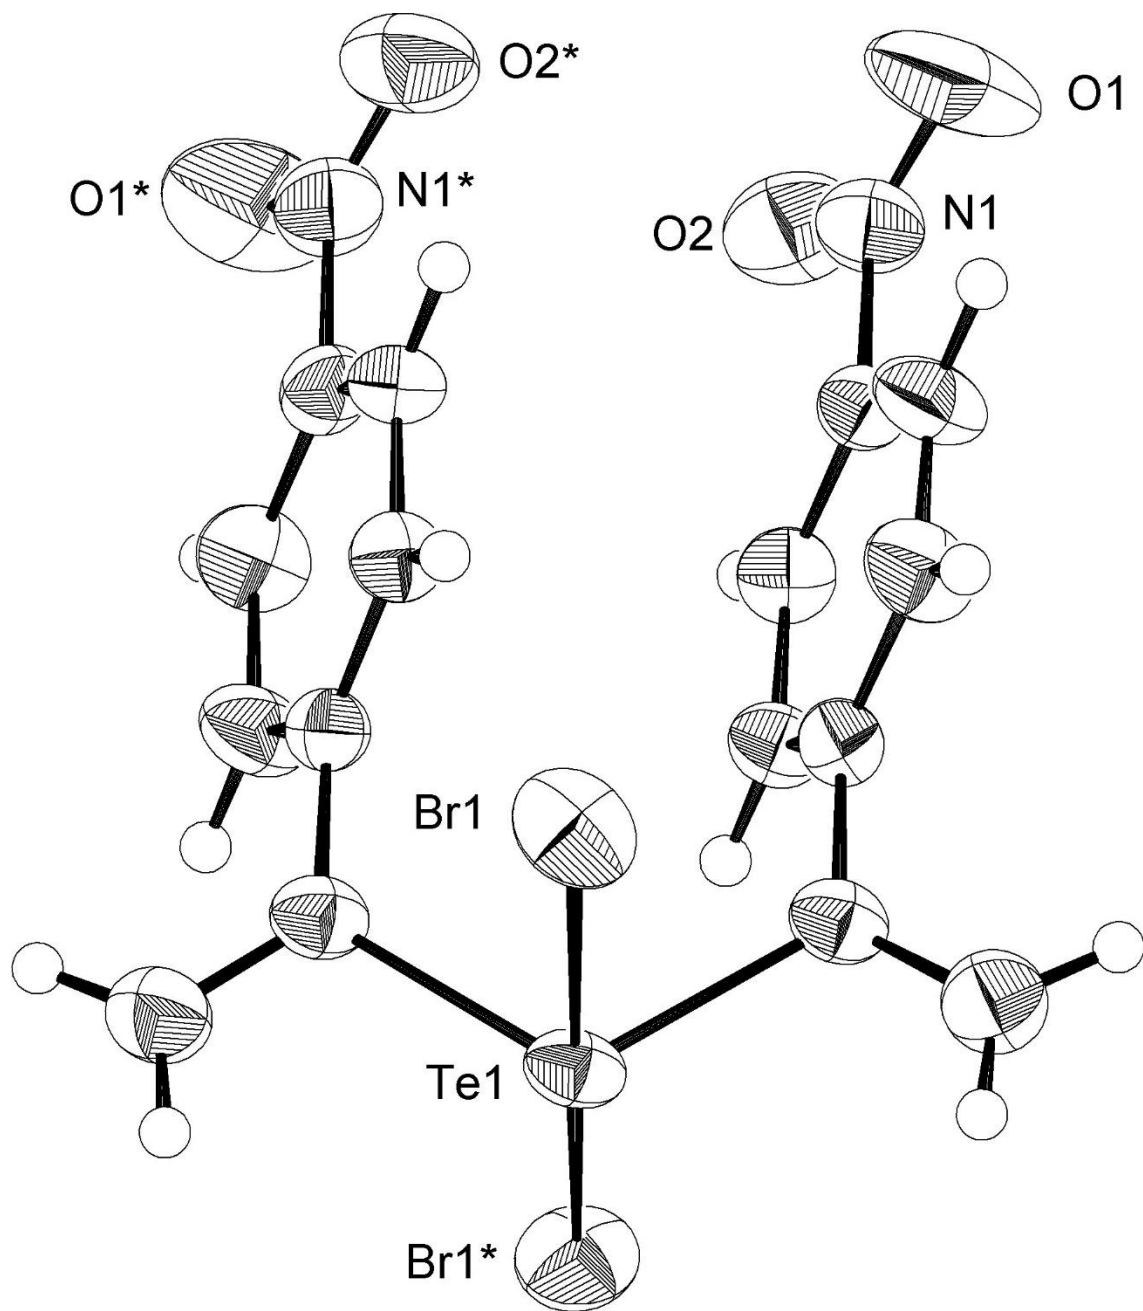

Table 4. Crystal data and structure refinement for tellurium dibromide **5e** (200123).

|                                   |                                                                                  |                  |
|-----------------------------------|----------------------------------------------------------------------------------|------------------|
| Identification code               | 200123                                                                           |                  |
| Empirical formula                 | C <sub>16</sub> H <sub>12</sub> Br <sub>2</sub> N <sub>2</sub> O <sub>4</sub> Te |                  |
| Formula weight                    | 583.70                                                                           |                  |
| Temperature                       | 293(2) K                                                                         |                  |
| Wavelength                        | 0.71075 Å                                                                        |                  |
| Crystal system                    | monoclinic                                                                       |                  |
| Space group                       | C2/c                                                                             |                  |
| Unit cell dimensions              | a = 15.726(10) Å                                                                 | α = 90°.         |
|                                   | b = 10.425(5) Å                                                                  | β = 121.565(8)°. |
|                                   | c = 13.630(8) Å                                                                  | γ = 90°.         |
| Volume                            | 1904.0(18) Å <sup>3</sup>                                                        |                  |
| Z                                 | 4                                                                                |                  |
| Density (calculated)              | 2.036 Mg/m <sup>3</sup>                                                          |                  |
| Absorption coefficient            | 5.782 mm <sup>-1</sup>                                                           |                  |
| F(000)                            | 1104                                                                             |                  |
| Crystal size                      | 0.20 x 0.15 x 0.10 mm <sup>3</sup>                                               |                  |
| Theta range for data collection   | 3.46 to 25.99°.                                                                  |                  |
| Index ranges                      | -19 ≤ h ≤ 19, -12 ≤ k ≤ 12, -16 ≤ l ≤ 16                                         |                  |
| Reflections collected             | 9702                                                                             |                  |
| Independent reflections           | 1875 [R(int) = 0.0400]                                                           |                  |
| Completeness to theta = 25.99°    | 99.8 %                                                                           |                  |
| Max. and min. transmission        | 0.5956 and 0.3910                                                                |                  |
| Refinement method                 | Full-matrix least-squares on F <sup>2</sup>                                      |                  |
| Data / restraints / parameters    | 1875 / 0 / 114                                                                   |                  |
| Goodness-of-fit on F <sup>2</sup> | 1.041                                                                            |                  |
| Final R indices [I > 2σ(I)]       | R1 = 0.0339, wR2 = 0.0720                                                        |                  |
| R indices (all data)              | R1 = 0.0437, wR2 = 0.0764                                                        |                  |
| Largest diff. peak and hole       | 1.646 and -0.512 e.Å <sup>-3</sup>                                               |                  |



Table 5. Atomic coordinates ( $\times 10^4$ ) and equivalent isotropic displacement parameters ( $\text{\AA}^2 \times 10^3$ ) for 200123.  $U(\text{eq})$  is defined as one third of the trace of the orthogonalized  $U^{ij}$  tensor.

|       | x       | y       | z       | $U(\text{eq})$ |
|-------|---------|---------|---------|----------------|
| Te(1) | 0       | 370(1)  | 7500    | 39(1)          |
| Br(1) | 1837(1) | 566(1)  | 9347(1) | 62(1)          |
| C(1)  | 519(3)  | 1528(3) | 6628(3) | 39(1)          |
| C(2)  | 920(3)  | 836(4)  | 6182(4) | 54(1)          |
| C(3)  | 476(3)  | 2947(3) | 6601(3) | 36(1)          |
| C(4)  | 1371(3) | 3612(4) | 7091(4) | 51(1)          |
| C(5)  | 1375(3) | 4938(4) | 7064(4) | 53(1)          |
| C(6)  | 479(3)  | 5562(3) | 6541(4) | 41(1)          |
| C(7)  | -414(3) | 4933(4) | 6041(3) | 42(1)          |
| C(8)  | -414(3) | 3608(4) | 6070(3) | 39(1)          |
| N(1)  | 479(3)  | 6975(3) | 6528(3) | 54(1)          |
| O(1)  | 1247(3) | 7534(3) | 6865(4) | 106(2)         |
| O(2)  | -311(3) | 7525(3) | 6162(3) | 75(1)          |

Table 6. Bond lengths [Å] and angles [°] for 200123.

|                      |            |                |          |
|----------------------|------------|----------------|----------|
| Te(1)-C(1)#1         | 2.133(4)   | C(4)-H(3)      | 0.9300   |
| Te(1)-C(1)           | 2.133(4)   | C(5)-C(6)      | 1.365(6) |
| Te(1)-Br(1)          | 2.6669(13) | C(5)-H(4)      | 0.9300   |
| Te(1)-Br(1)#1        | 2.6669(13) | C(6)-C(7)      | 1.366(6) |
| C(1)-C(2)            | 1.299(6)   | C(6)-N(1)      | 1.473(5) |
| C(1)-C(3)            | 1.481(5)   | C(7)-C(8)      | 1.382(5) |
| C(2)-H(1)            | 0.9300     | C(7)-H(5)      | 0.9300   |
| C(2)-H(2)            | 0.9300     | C(8)-H(6)      | 0.9300   |
| C(3)-C(8)            | 1.377(5)   | N(1)-O(1)      | 1.195(5) |
| C(3)-C(4)            | 1.387(5)   | N(1)-O(2)      | 1.213(5) |
| C(4)-C(5)            | 1.383(6)   |                |          |
|                      |            |                |          |
| C(1)#1-Te(1)-C(1)    | 111.1(2)   | C(6)-C(5)-H(4) | 120.9    |
| C(1)#1-Te(1)-Br(1)   | 88.40(11)  | C(4)-C(5)-H(4) | 120.9    |
| C(1)-Te(1)-Br(1)     | 86.63(11)  | C(5)-C(6)-C(7) | 122.8(4) |
| C(1)#1-Te(1)-Br(1)#1 | 86.63(11)  | C(5)-C(6)-N(1) | 118.5(4) |
| C(1)-Te(1)-Br(1)#1   | 88.40(11)  | C(7)-C(6)-N(1) | 118.7(4) |
| Br(1)-Te(1)-Br(1)#1  | 171.20(3)  | C(6)-C(7)-C(8) | 118.8(4) |
| C(2)-C(1)-C(3)       | 124.8(4)   | C(6)-C(7)-H(5) | 120.6    |
| C(2)-C(1)-Te(1)      | 111.6(3)   | C(8)-C(7)-H(5) | 120.6    |
| C(3)-C(1)-Te(1)      | 123.6(3)   | C(3)-C(8)-C(7) | 120.0(4) |
| C(1)-C(2)-H(1)       | 120.0      | C(3)-C(8)-H(6) | 120.0    |
| C(1)-C(2)-H(2)       | 120.0      | C(7)-C(8)-H(6) | 120.0    |
| H(1)-C(2)-H(2)       | 120.0      | O(1)-N(1)-O(2) | 122.5(4) |
| C(8)-C(3)-C(4)       | 119.9(4)   | O(1)-N(1)-C(6) | 119.3(4) |
| C(8)-C(3)-C(1)       | 122.3(3)   | O(2)-N(1)-C(6) | 118.2(4) |
| C(4)-C(3)-C(1)       | 117.7(3)   |                |          |
| C(5)-C(4)-C(3)       | 120.3(4)   |                |          |
| C(5)-C(4)-H(3)       | 119.9      |                |          |
| C(3)-C(4)-H(3)       | 119.9      |                |          |
| C(6)-C(5)-C(4)       | 118.2(4)   |                |          |

---

Symmetry transformations used to generate equivalent atoms:

#1  $-x, y, -z+3/2$

Table 7. Anisotropic displacement parameters ( $\text{\AA}^2 \times 10^3$ ) for 200123. The anisotropic displacement factor exponent takes the form:  $-2\pi^2 [ h^2 a^{*2} U^{11} + \dots + 2 h k a^* b^* U^{12} ]$

|       | $U^{11}$ | $U^{22}$ | $U^{33}$ | $U^{23}$ | $U^{13}$ | $U^{12}$ |
|-------|----------|----------|----------|----------|----------|----------|
| Te(1) | 33(1)    | 28(1)    | 50(1)    | 0        | 18(1)    | 0        |
| Br(1) | 34(1)    | 74(1)    | 59(1)    | 13(1)    | 13(1)    | 4(1)     |
| C(1)  | 32(2)    | 35(2)    | 46(2)    | 2(2)     | 17(2)    | 0(2)     |
| C(2)  | 58(3)    | 44(2)    | 64(3)    | 2(2)     | 35(3)    | 5(2)     |
| C(3)  | 35(2)    | 35(2)    | 38(2)    | 3(2)     | 20(2)    | 2(2)     |
| C(4)  | 36(2)    | 46(2)    | 72(3)    | 4(2)     | 28(2)    | 6(2)     |
| C(5)  | 40(3)    | 44(2)    | 74(3)    | -4(2)    | 29(2)    | -11(2)   |
| C(6)  | 51(3)    | 33(2)    | 44(3)    | 0(2)     | 28(2)    | -4(2)    |
| C(7)  | 41(2)    | 36(2)    | 44(2)    | 6(2)     | 20(2)    | 8(2)     |
| C(8)  | 32(2)    | 40(2)    | 42(2)    | -1(2)    | 16(2)    | -3(2)    |
| N(1)  | 68(3)    | 35(2)    | 66(3)    | 0(2)     | 39(2)    | -4(2)    |
| O(1)  | 84(3)    | 47(2)    | 185(5)   | -7(2)    | 69(3)    | -21(2)   |
| O(2)  | 90(3)    | 42(2)    | 87(3)    | 1(2)     | 43(3)    | 11(2)    |

Table 8. Hydrogen coordinates ( $\times 10^4$ ) and isotropic displacement parameters ( $\text{\AA}^2 \times 10^{-3}$ ) for 200123.

|      | x     | y    | z    | U(eq) |
|------|-------|------|------|-------|
| H(1) | 1208  | 1231 | 5813 | 65    |
| H(2) | 920   | -53  | 6232 | 65    |
| H(3) | 1971  | 3164 | 7440 | 62    |
| H(4) | 1971  | 5392 | 7393 | 64    |
| H(5) | -1011 | 5387 | 5687 | 50    |
| H(6) | -1015 | 3163 | 5731 | 47    |

Table 9. Torsion angles [°] for 200123.

---

|                         |           |
|-------------------------|-----------|
| C(1)#1-Te(1)-C(1)-C(2)  | 174.1(4)  |
| Br(1)-Te(1)-C(1)-C(2)   | 87.2(3)   |
| Br(1)#1-Te(1)-C(1)-C(2) | -100.1(3) |
| C(1)#1-Te(1)-C(1)-C(3)  | -2.5(3)   |
| Br(1)-Te(1)-C(1)-C(3)   | -89.5(3)  |
| Br(1)#1-Te(1)-C(1)-C(3) | 83.3(3)   |
| C(2)-C(1)-C(3)-C(8)     | 118.9(5)  |
| Te(1)-C(1)-C(3)-C(8)    | -64.9(5)  |
| C(2)-C(1)-C(3)-C(4)     | -58.3(6)  |
| Te(1)-C(1)-C(3)-C(4)    | 117.9(4)  |
| C(8)-C(3)-C(4)-C(5)     | 0.9(7)    |
| C(1)-C(3)-C(4)-C(5)     | 178.3(4)  |
| C(3)-C(4)-C(5)-C(6)     | -0.2(7)   |
| C(4)-C(5)-C(6)-C(7)     | -0.4(7)   |
| C(4)-C(5)-C(6)-N(1)     | 178.9(4)  |
| C(5)-C(6)-C(7)-C(8)     | 0.4(7)    |
| N(1)-C(6)-C(7)-C(8)     | -178.9(4) |
| C(4)-C(3)-C(8)-C(7)     | -0.9(6)   |
| C(1)-C(3)-C(8)-C(7)     | -178.2(4) |
| C(6)-C(7)-C(8)-C(3)     | 0.3(6)    |
| C(5)-C(6)-N(1)-O(1)     | 7.6(7)    |
| C(7)-C(6)-N(1)-O(1)     | -173.1(5) |
| C(5)-C(6)-N(1)-O(2)     | -173.0(4) |
| C(7)-C(6)-N(1)-O(2)     | 6.3(6)    |

---

Symmetry transformations used to generate equivalent atoms:

#1 -x,y,-z+3/2
